# Supplementary material for: Teucrium montanum L.—Unrecognized Source of Phenylethanoid Glycosides: Green Extraction Approach and Elucidation of Phenolic Compounds via NMR and UHPLC-HR MS/MS
Source: MDPI journal article supplement (doi:10.3390/antiox12111903), 2023-10-24
Supplement: s1 [file s1]

## Supplementary Materials

|                                                                                                                                                                                                             |    |
|-------------------------------------------------------------------------------------------------------------------------------------------------------------------------------------------------------------|----|
| <b>Figure S1:</b> $^1\text{H}$ spectrum, structure, numbering and full assignment of <b>echinacoside</b> in methanol- $\text{d}_4$ at 25 °C .....                                                           | 2  |
| <b>Figure S2:</b> $^{13}\text{C}$ spectrum, structure, numbering and full assignment of <b>echinacoside</b> in methanol- $\text{d}_4$ at 25 °C....                                                          | 3  |
| <b>Figure S3:</b> COSY spectrum of <b>echinacoside</b> in methanol- $\text{d}_4$ at 25 °C .....                                                                                                             | 4  |
| <b>Figure S4:</b> $^1\text{H}$ - $^{13}\text{C}$ HSQC spectrum of <b>echinacoside</b> in methanol- $\text{d}_4$ at 25 °C .....                                                                              | 5  |
| <b>Figure S5:</b> $^1\text{H}$ - $^{13}\text{C}$ HMBC spectrum of <b>echinacoside</b> in methanol- $\text{d}_4$ at 25 °C .....                                                                              | 6  |
| <b>Figure S6:</b> Fully assigned NOESY spectrum of <b>echinacoside</b> in methanol- $\text{d}_4$ at 25 °C .....                                                                                             | 7  |
| <b>Figure S7:</b> $^1\text{H}$ spectrum, structure, numbering and full assignment of <b>verbascoside</b> in methanol- $\text{d}_4$ at 25 °C.....                                                            | 8  |
| <b>Figure S8:</b> $^{13}\text{C}$ spectrum, structure, numbering and full assignment of <b>verbascoside</b> in methanol- $\text{d}_4$ at 25 °C....                                                          | 9  |
| <b>Figure S9:</b> COSY spectrum of <b>verbascoside</b> in methanol- $\text{d}_4$ at 25 °C.....                                                                                                              | 10 |
| <b>Figure S10:</b> $^1\text{H}$ - $^{13}\text{C}$ HSQC spectrum of <b>verbascoside</b> in methanol- $\text{d}_4$ at 25 °C.....                                                                              | 11 |
| <b>Figure S11:</b> $^1\text{H}$ - $^{13}\text{C}$ HMBC spectrum of <b>verbascoside</b> in methanol- $\text{d}_4$ at 25 °C.....                                                                              | 12 |
| <b>Figure S12:</b> $^1\text{H}$ spectrum, structure, numbering and full assignment of <b>PH5</b> in methanol- $\text{d}_4$ at 25 °C.....                                                                    | 13 |
| <b>Figure S13:</b> $^{13}\text{C}$ spectrum, structure, numbering and full assignment of <b>PH5</b> in methanol- $\text{d}_4$ at 25 °C.....                                                                 | 14 |
| <b>Figure S14:</b> COSY spectrum of <b>PH5</b> in methanol- $\text{d}_4$ at 25 °C.....                                                                                                                      | 15 |
| <b>Figure S15:</b> $^1\text{H}$ - $^{13}\text{C}$ HSQC spectrum of <b>PH5</b> in methanol- $\text{d}_4$ at 25 °C .....                                                                                      | 16 |
| <b>Figure S16:</b> $^1\text{H}$ - $^{13}\text{C}$ HMBC spectrum of <b>PH5</b> in methanol- $\text{d}_4$ at 25 °C .....                                                                                      | 17 |
| <b>Figure S17:</b> Fully assigned NOESY spectrum of <b>PH5</b> in methanol- $\text{d}_4$ at 25 °C .....                                                                                                     | 18 |
| <b>Figure S18:</b> $^1\text{H}$ spectrum, structure, numbering and full assignment of <b>PH6</b> in methanol- $\text{d}_4$ at 25 °C.....                                                                    | 19 |
| <b>Figure S19:</b> $^{13}\text{C}$ spectrum, structure, numbering and full assignment of <b>PH6</b> in methanol- $\text{d}_4$ at 25 °C.....                                                                 | 20 |
| <b>Figure S20:</b> COSY spectrum of <b>PH6</b> in methanol- $\text{d}_4$ at 25 °C.....                                                                                                                      | 21 |
| <b>Figure S21:</b> $^1\text{H}$ - $^{13}\text{C}$ HSQC spectrum of <b>PH6</b> in methanol- $\text{d}_4$ at 25 °C .....                                                                                      | 22 |
| <b>Figure S22:</b> $^1\text{H}$ - $^{13}\text{C}$ HMBC spectrum of <b>PH6</b> in methanol- $\text{d}_4$ at 25 °C .....                                                                                      | 23 |
| <b>Figure S23:</b> Fully assigned NOESY spectrum of <b>PH6</b> in methanol- $\text{d}_4$ at 25 °C .....                                                                                                     | 24 |
| <b>Figure S24:</b> $^1\text{H}$ spectrum, structure, numbering and full assignment of <b>PH7</b> in methanol- $\text{d}_4$ at 25 °C.....                                                                    | 25 |
| <b>Figure S25:</b> $^{13}\text{C}$ spectrum, structure, numbering and full assignment of <b>PH7</b> in methanol- $\text{d}_4$ at 25 °C.....                                                                 | 26 |
| <b>Figure S26:</b> COSY spectrum of <b>PH7</b> in methanol- $\text{d}_4$ at 25 °C.....                                                                                                                      | 27 |
| <b>Figure S27:</b> $^1\text{H}$ - $^{13}\text{C}$ HSQC spectrum of <b>PH7</b> in methanol- $\text{d}_4$ at 25 °C .....                                                                                      | 28 |
| <b>Figure S28:</b> $^1\text{H}$ - $^{13}\text{C}$ HMBC spectrum of <b>PH7</b> in methanol- $\text{d}_4$ at 25 °C .....                                                                                      | 29 |
| <b>Figure S29:</b> Fully assigned NOESY spectrum of <b>PH7</b> in methanol- $\text{d}_4$ at 25 °C .....                                                                                                     | 30 |
| <b>Table S1:</b> Comparison of proton chemical shifts for all analyzed compounds in methanol- $\text{d}_4$ at 25 °C, the biggest differences marked with superscripted mark “ * ” .....                     | 31 |
| <b>Table S2:</b> Comparison of carbon chemical shifts for all analyzed compounds in methanol- $\text{d}_4$ at 25 °C, the biggest differences marked with superscripted mark “ * ” .....                     | 32 |
| <b>Table S3:</b> Comparison of coupling constants $^nJ_{\text{H,H}}$ (Hz) for all analyzed compounds in methanol- $\text{d}_4$ at 25 °C, the biggest differences marked with superscripted mark “ * ” ..... | 33 |

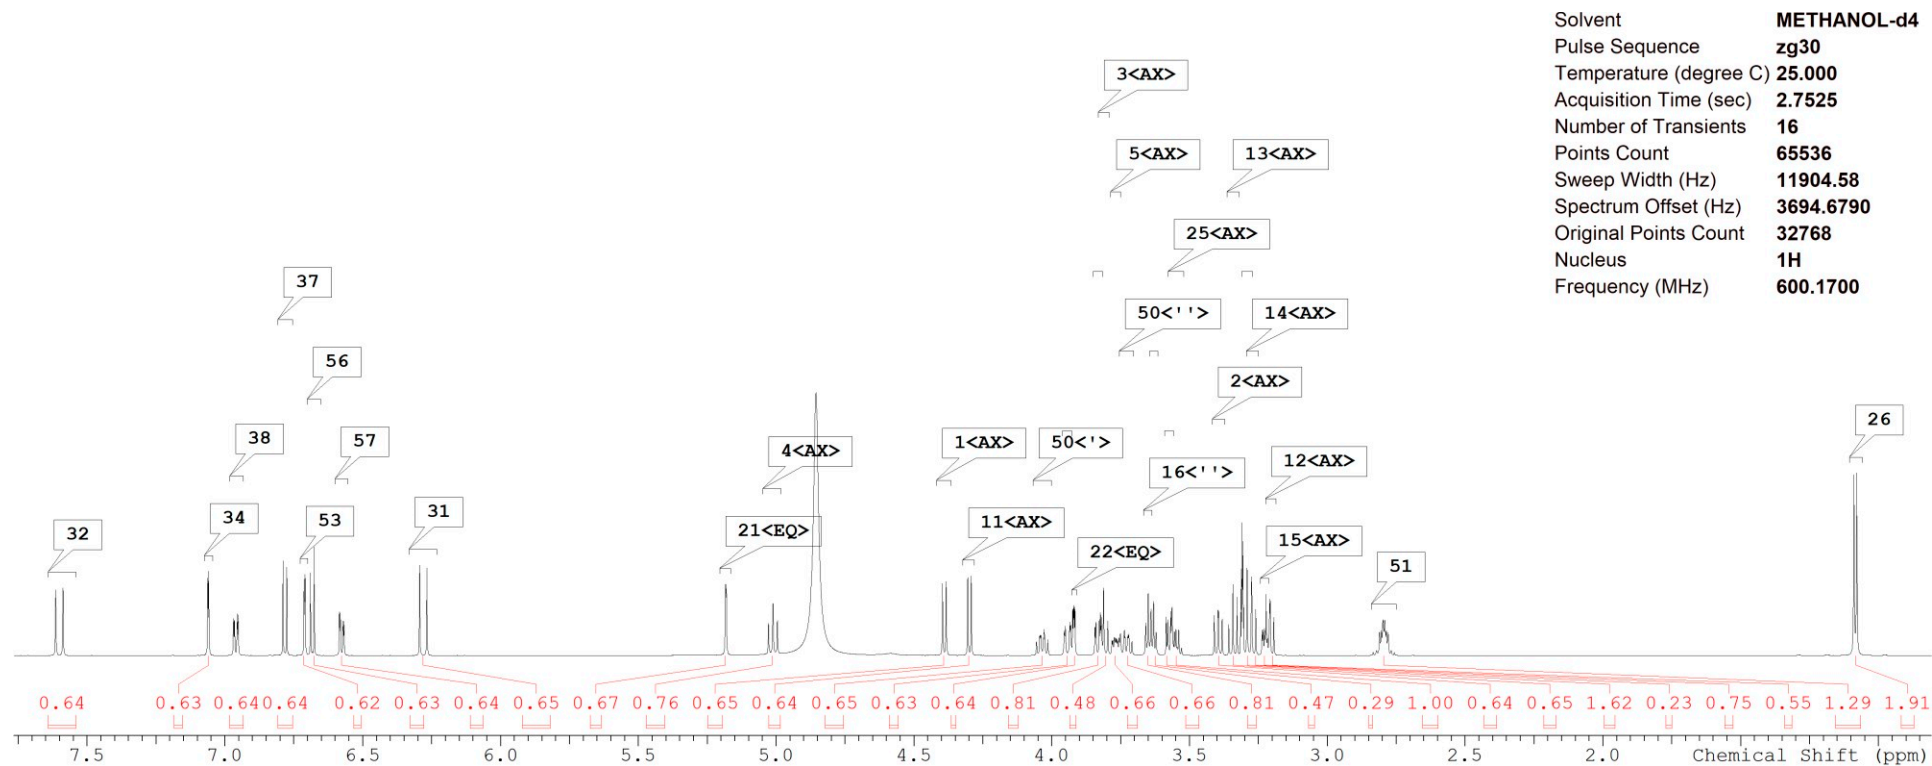

| Shift1 (ppm) | H's   | Type | J (Hz)        | Atom1  | Multiplet1 | Shift1 (ppm) | H's   | Type | J (Hz)        | Atom1  | Multiplet1 |
|--------------|-------|------|---------------|--------|------------|--------------|-------|------|---------------|--------|------------|
| 1.085        | 3.000 | d    | 6.2           | 26     | M31        | 3.920        | 1.000 | dd   | 3.3, 1.8      | 22<EQ> | M15        |
| 2.796        | 2.000 | m    | -             | 51     | M20        | 3.943        | 1.000 | dd   | 11.4, 2.2     | 6<'>   | M14        |
| 3.209        | 1.000 | dd   | 9.3, 7.8      | 12<AX> | M26        | 4.035        | 1.000 | ddd  | 9.6, 8.1, 7.0 | 50<'>  | M13        |
| 3.223        | 1.000 | ddd  | 9.4, 5.4, 2.2 | 15<AX> | M30        | 4.299        | 1.000 | d    | 7.6           | 11<AX> | M12        |
| 3.276        | 1.000 | t    | 8.9           | 14<AX> | M28        | 4.390        | 1.000 | d    | 7.8           | 1<AX>  | M11        |
| 3.292        | 1.000 | t    | 9.6           | 24<AX> | M29        | 5.012        | 1.000 | t    | 9.6           | 4<AX>  | M10        |
| 3.343        | 1.000 | t    | 9.1           | 13<AX> | M27        | 5.183        | 1.000 | d    | 1.6           | 21<EQ> | M09        |
| 3.396        | 1.000 | dd   | 9.1, 8.0      | 2<AX>  | M25        | 6.281        | 1.000 | d    | 16.0          | 31     | M02        |
| 3.553        | 1.000 | dq   | 9.6, 6.2      | 25<AX> | M24        | 6.577        | 1.000 | dd   | 8.1, 2.1      | 57     | M08        |
| 3.574        | 1.000 | m    | 9.4, 3.3      | 23<AX> | M23        | 6.683        | 1.000 | d    | 8.0           | 56     | M07        |
| 3.636        | 1.000 | t    | 11.4, 5.4     | 6<'>   | M19        | 6.712        | 1.000 | d    | 2.2           | 53     | M06        |
| 3.645        | 1.000 | t    | 11.9, 5.6     | 16<'>  | M22        | 6.783        | 1.000 | d    | 8.2           | 37     | M05        |
| 3.730        | 1.000 | m    | 9.6, 8.2, 6.7 | 50<'>  | M18        | 6.961        | 1.000 | dd   | 8.3, 2.1      | 38     | M04        |
| 3.767        | 1.000 | ddd  | 9.6, 5.4, 2.2 | 5<AX>  | M21        | 7.061        | 1.000 | d    | 2.0           | 34     | M03        |
| 3.812        | 1.000 | br t | 9.3           | 3<AX>  | M16        | 7.602        | 1.000 | d    | 15.8          | 32     | M01        |
| 3.832        | 1.000 | dd   | 11.9, 2.3     | 16<'>  | M17        |              |       |      |               |        |            |

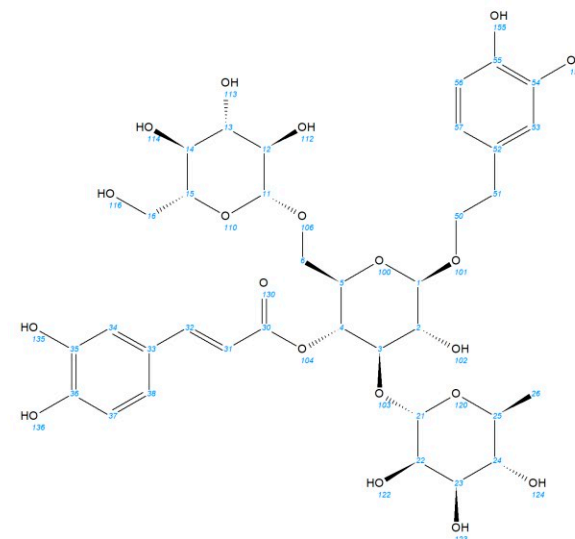

**Figure S1:** <sup>1</sup>H spectrum, structure, numbering and full assignment of **echinacoside** in methanol-d<sub>4</sub> at 25 °C

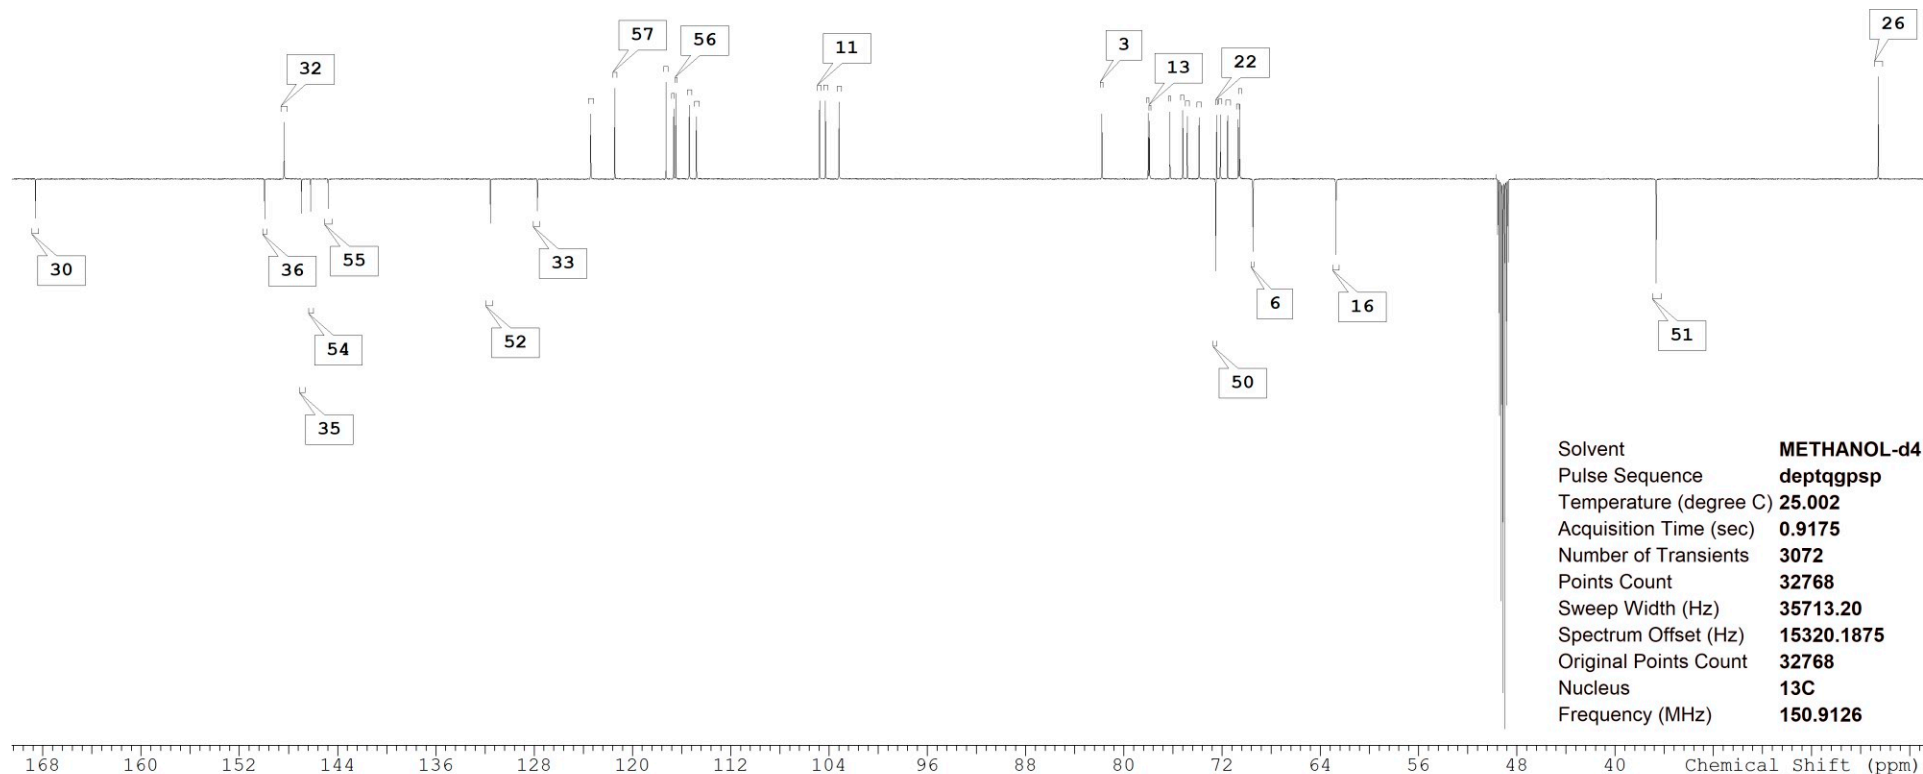

| Shift1 (ppm) | C's   | Type | Atom1 | Multiplet1 | Shift1 (ppm) | C's   | Type | Atom1 | Multiplet1 | Shift1 (ppm) | C's   | Type | Atom1 | Multiplet1 |
|--------------|-------|------|-------|------------|--------------|-------|------|-------|------------|--------------|-------|------|-------|------------|
| 18.589       | 1.000 | s    | 26    | M35        | 78.020       | 1.000 | s    | 15    | M20        | 146.218      | 1.000 | s    | 54    | M04        |
| 36.680       | 1.000 | s    | 51    | M34        | 81.790       | 1.000 | s    | 3     | M19        | 146.955      | 1.000 | s    | 35    | M03        |
| 62.745       | 1.000 | s    | 16    | M33        | 103.196      | 1.000 | s    | 21    | M18        | 148.371      | 1.000 | s    | 32    | M08        |
| 69.498       | 1.000 | s    | 6     | M32        | 104.301      | 1.000 | s    | 1     | M17        | 149.967      | 1.000 | s    | 36    | M02        |
| 70.574       | 1.000 | s    | 25    | M30        | 104.778      | 1.000 | s    | 11    | M16        | 168.614      | 1.000 | s    | 30    | M01        |
| 70.696       | 1.000 | s    | 4     | M29        | 114.809      | 1.000 | s    | 31    | M15        |              |       |      |       |            |
| 71.563       | 1.000 | s    | 14    | M28        | 115.387      | 1.000 | s    | 34    | M14        |              |       |      |       |            |
| 72.163       | 1.000 | s    | 23    | M27        | 116.478      | 1.000 | s    | 56    | M13        |              |       |      |       |            |
| 72.466       | 1.000 | s    | 22    | M26        | 116.651      | 1.000 | s    | 37    | M12        |              |       |      |       |            |
| 72.524       | 1.000 | s    | 50    | M31        | 117.279      | 1.000 | s    | 53    | M11        |              |       |      |       |            |
| 73.881       | 1.000 | s    | 24    | M25        | 121.454      | 1.000 | s    | 57    | M10        |              |       |      |       |            |
| 74.849       | 1.000 | s    | 5     | M24        | 123.411      | 1.000 | s    | 38    | M09        |              |       |      |       |            |
| 75.210       | 1.000 | s    | 12    | M23        | 127.759      | 1.000 | s    | 33    | M07        |              |       |      |       |            |
| 76.257       | 1.000 | s    | 2     | M22        | 131.579      | 1.000 | s    | 52    | M06        |              |       |      |       |            |
| 77.919       | 1.000 | s    | 13    | M21        | 144.788      | 1.000 | s    | 55    | M05        |              |       |      |       |            |

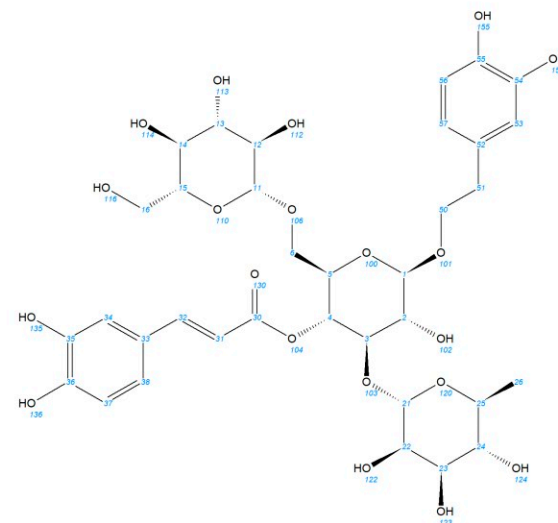

**Figure S2:**  $^{13}\text{C}$  spectrum, structure, numbering and full assignment of **echinacoside** in methanol- $\text{d}_4$  at 25 °C

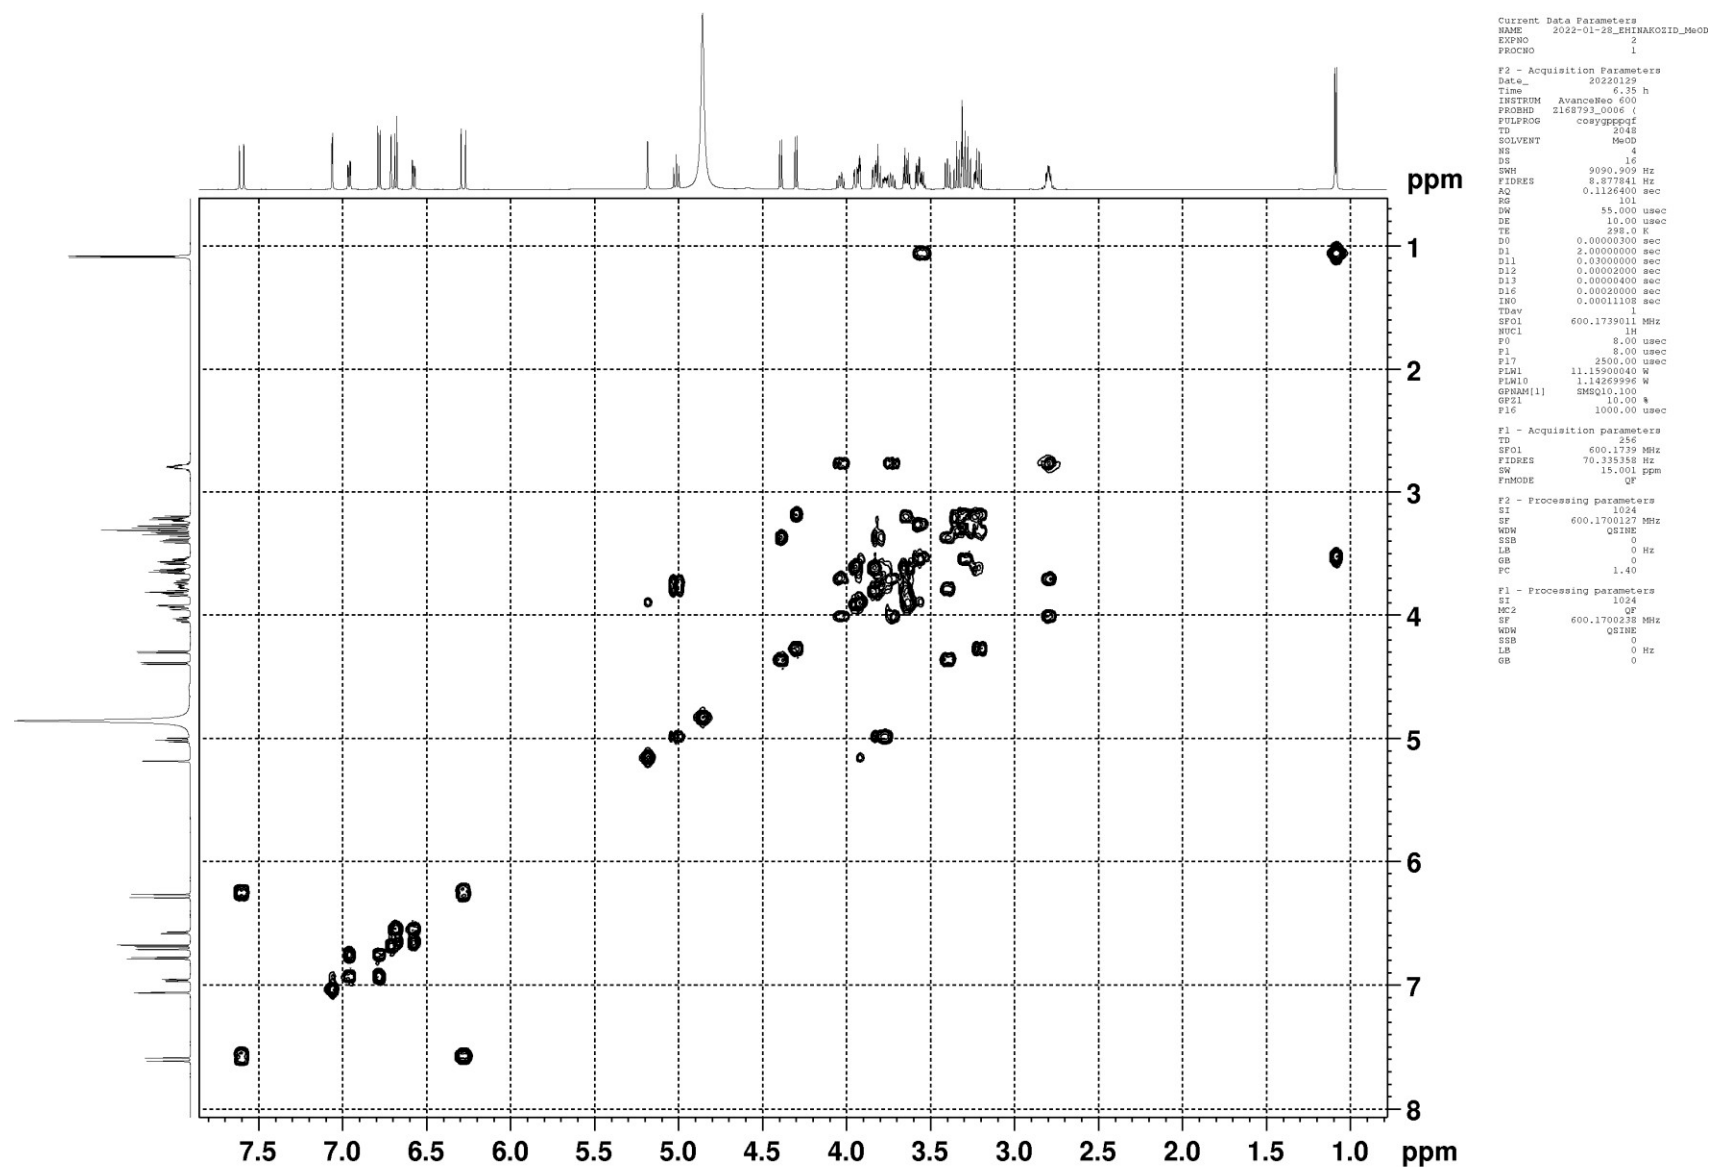

Figure S3: COSY spectrum of **echinacoside** in methanol- $d_4$  at 25 °C



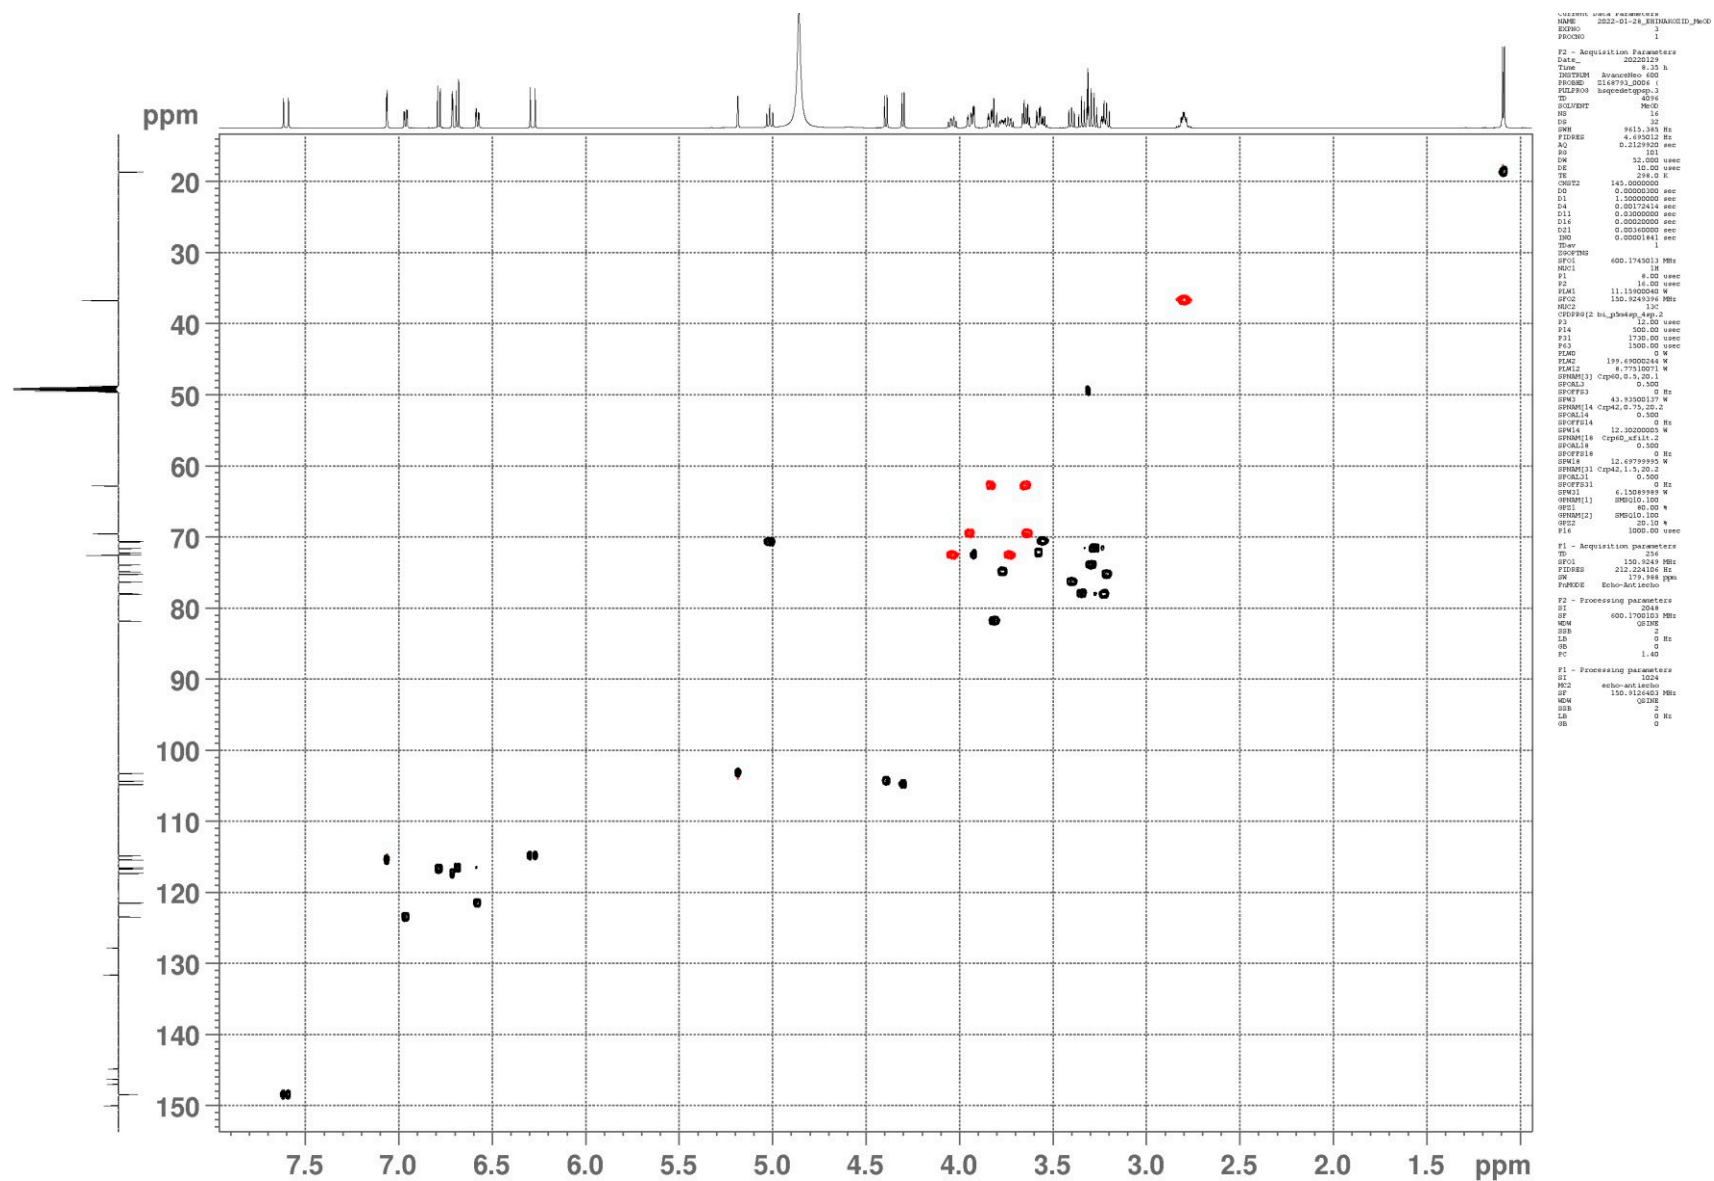

**Figure S4:**  $^1\text{H}$ - $^{13}\text{C}$  HSQC spectrum of echinacoside in methanol- $\text{d}_4$  at 25 °C

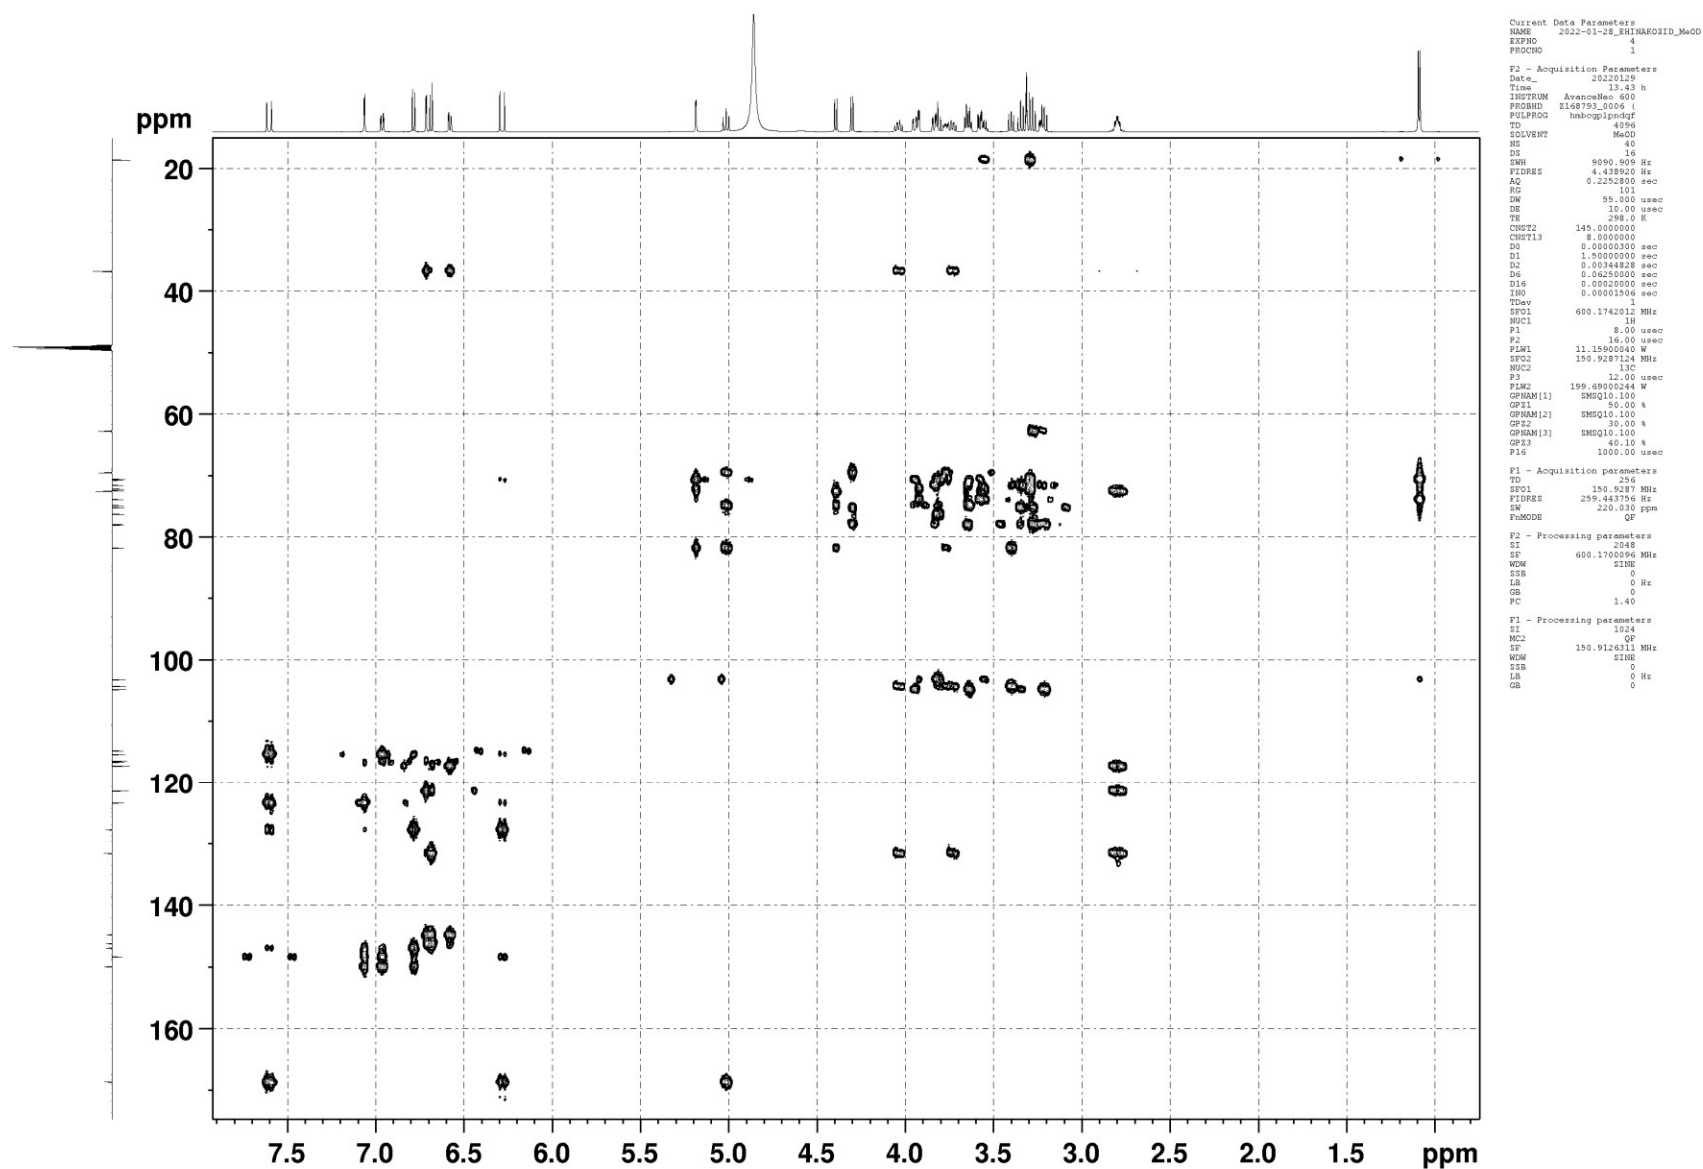

**Figure S5:**  $^1\text{H}$ - $^{13}\text{C}$  HMBC spectrum of echinacoside in methanol- $\text{d}_4$  at 25  $^{\circ}\text{C}$

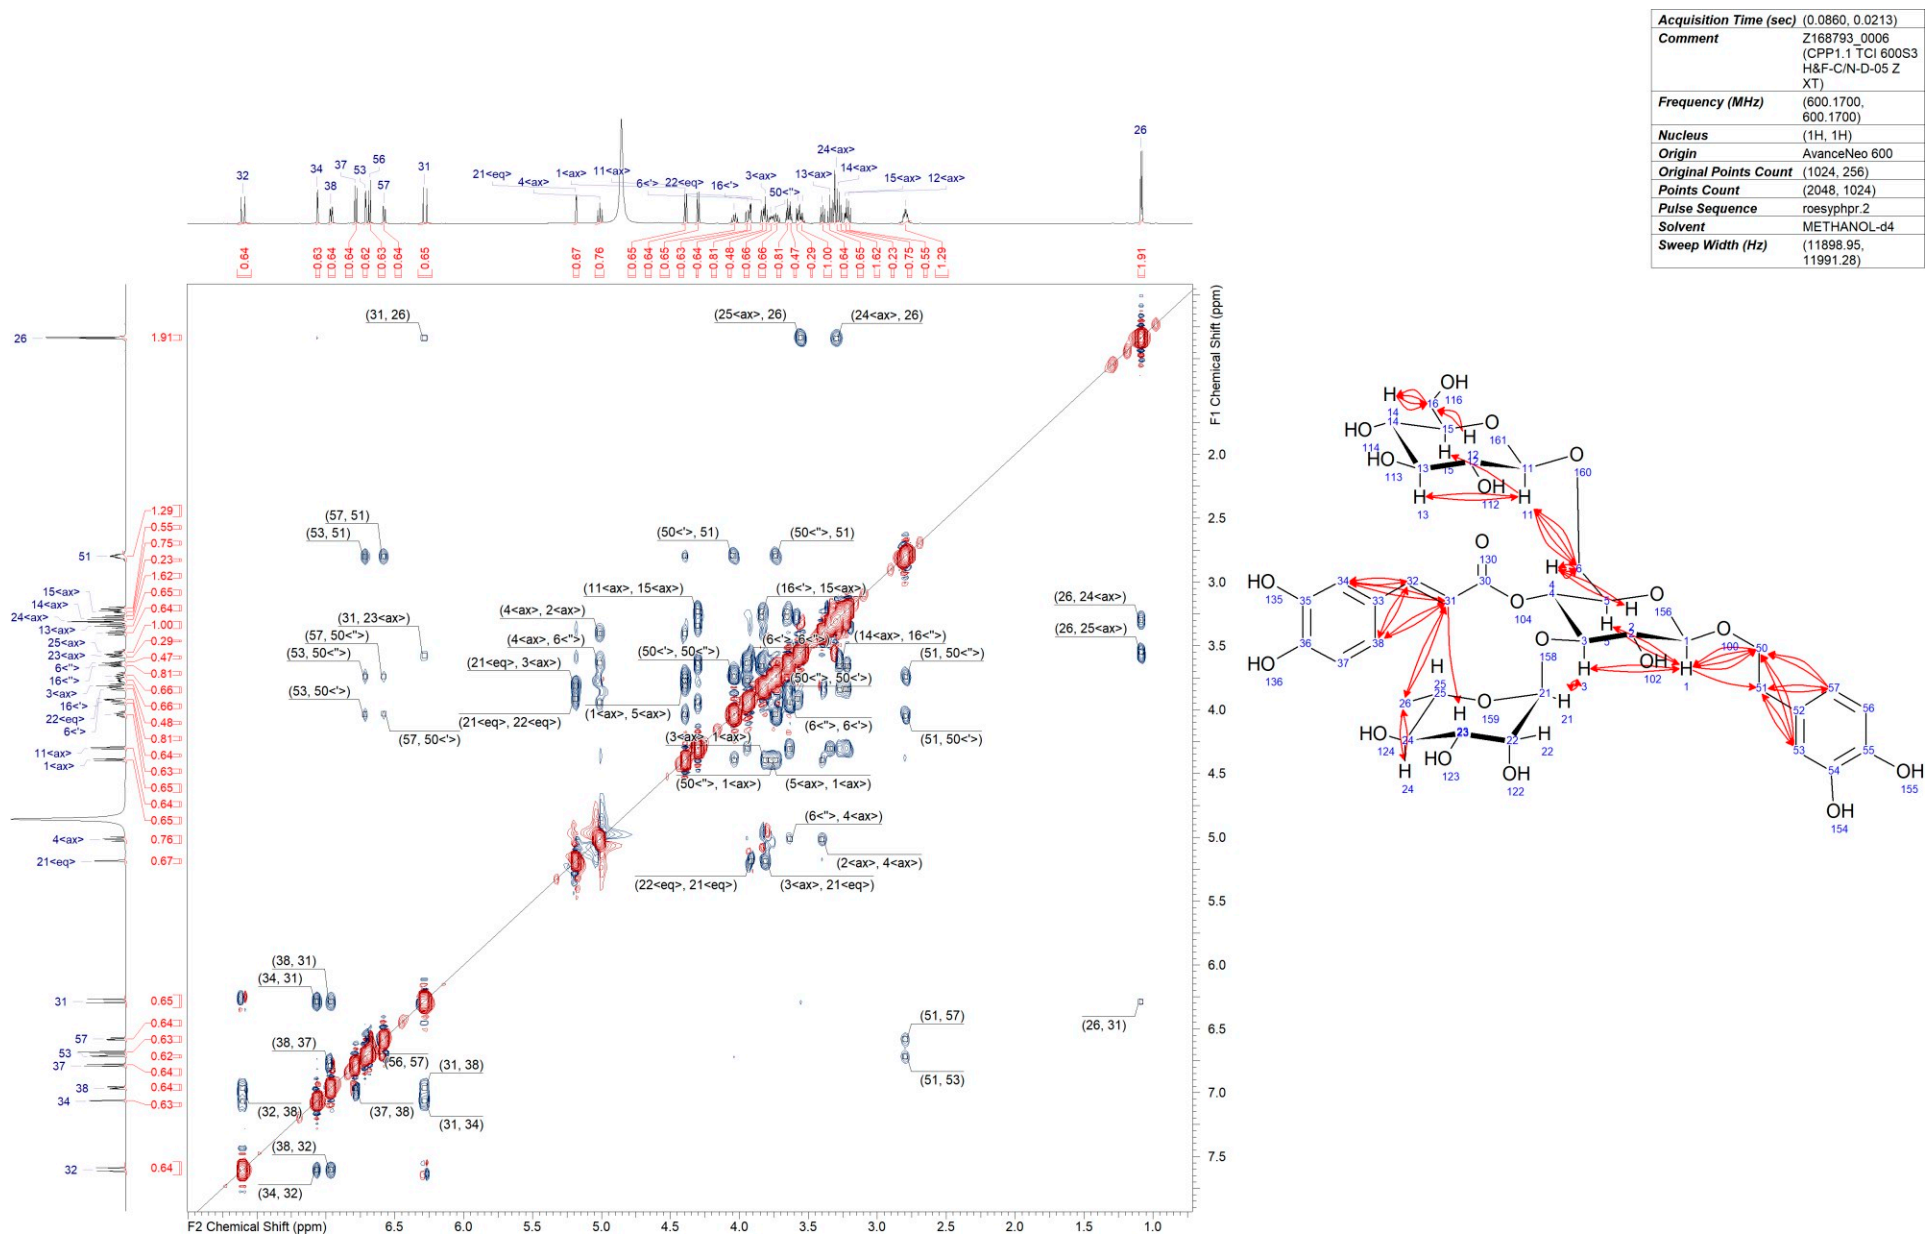

**Figure S6:** Fully assigned NOESY spectrum of **echinacoside** in methanol-d<sub>4</sub> at 25 °C

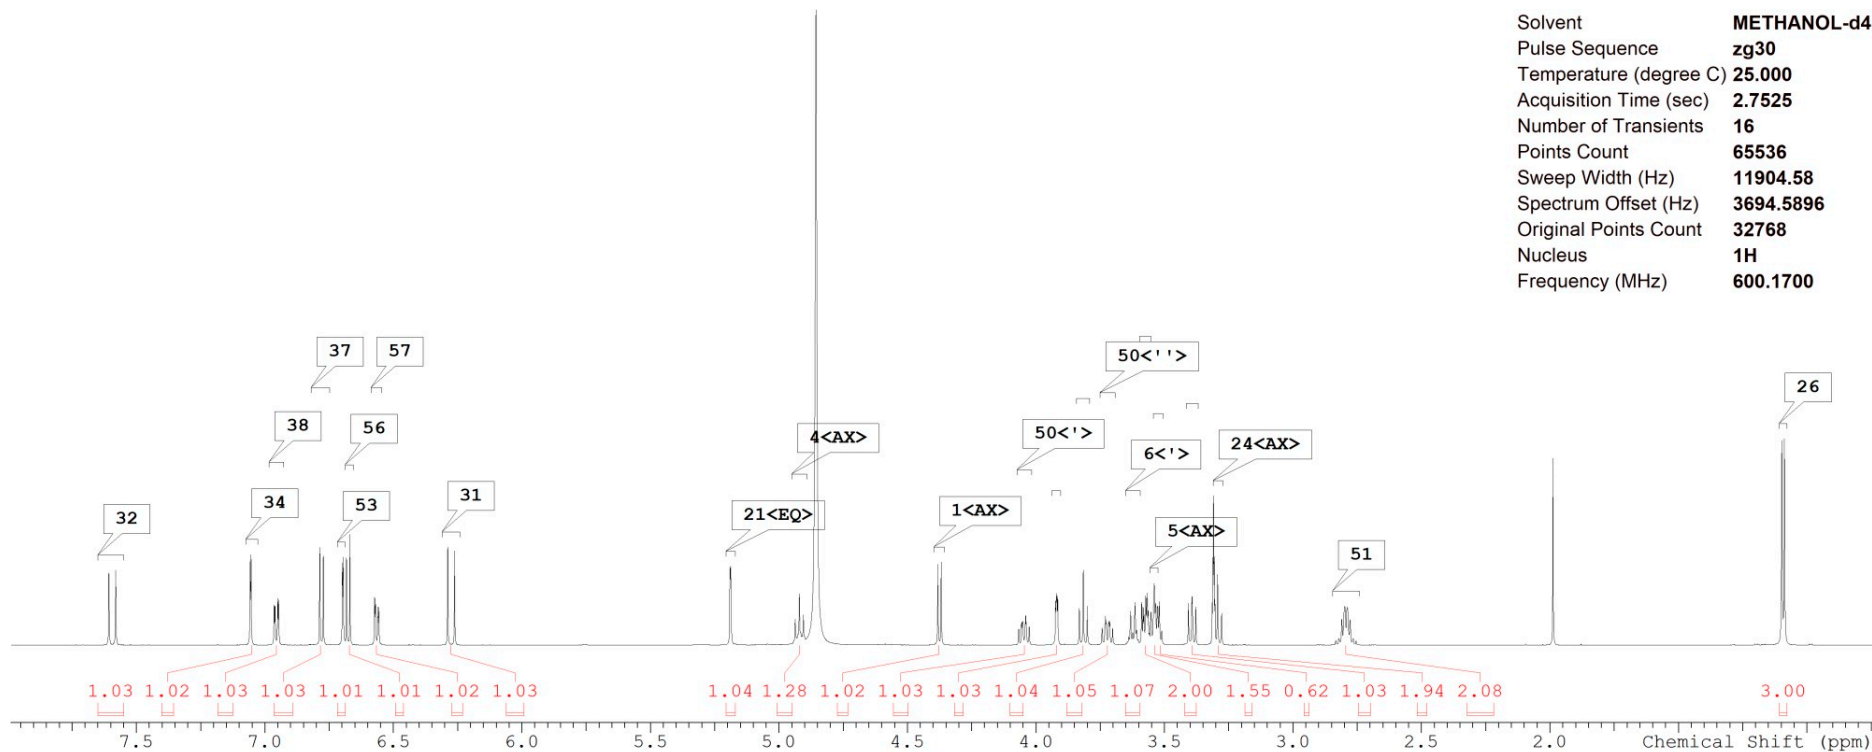

| Shift1 (ppm) | H's   | Type | J (Hz)        | Atom1          | Multiplet1 | Shift1 (ppm) | H's   | Type | J (Hz)   | Atom1 | Multiplet1 |
|--------------|-------|------|---------------|----------------|------------|--------------|-------|------|----------|-------|------------|
| 1.094        | 3.000 | d    | 6.2           | 26             | M19        | 6.276        | 1.000 | d    | 15.8     | 31    | M08        |
| 2.794        | 2.000 | m    | -             | 51             | M17        | 6.566        | 1.000 | dd   | 8.1, 2.1 | 57    | M07        |
| 3.294        | 1.000 | t    | 9.6           | 24<AX>         | M18        | 6.677        | 1.000 | d    | 8.0      | 56    | M06        |
| 3.393        | 1.000 | dd   | 9.2, 7.9      | 2<AX>          | M20        | 6.698        | 1.000 | d    | 2.0      | 53    | M05        |
| 3.524        | 1.000 | dd   | 10.2, 5.8     | 6<''>          | M21        | 6.780        | 1.000 | d    | 8.2      | 37    | M04        |
| 3.542        | 1.000 | m    | -             | 5<AX>          | M22        | 6.956        | 1.000 | dd   | 8.2, 2.0 | 38    | M03        |
| 3.572        | 2.000 | m    | -             | 23<AX>, 25<AX> | M23        | 7.057        | 1.000 | d    | 2.0      | 34    | M02        |
| 3.624        | 1.000 | d    | 10.0          | 6<'>           | M16        | 7.595        | 1.000 | d    | 15.8     | 32    | M01        |
| 3.723        | 1.000 | ddd  | 9.6, 8.3, 6.8 | 50<'>          | M15        |              |       |      |          |       |            |
| 3.816        | 1.000 | t    | 9.3           | 3<AX>          | M14        |              |       |      |          |       |            |
| 3.920        | 1.000 | dd   | 3.2, 1.7      | 22<EQ>         | M13        |              |       |      |          |       |            |
| 4.047        | 1.000 | ddd  | 9.5, 8.3, 6.7 | 50<'>          | M12        |              |       |      |          |       |            |
| 4.376        | 1.000 | d    | 7.8           | 1<AX>          | M11        |              |       |      |          |       |            |
| 4.921        | 1.000 | br t | 9.4           | 4<AX>          | M10        |              |       |      |          |       |            |
| 5.189        | 1.000 | d    | 1.6           | 21<EQ>         | M09        |              |       |      |          |       |            |

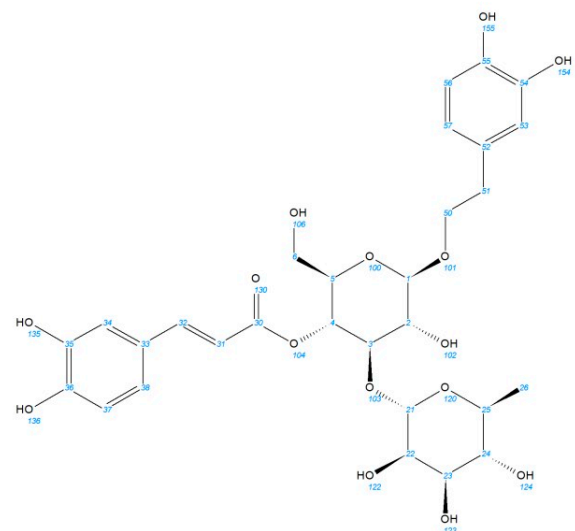

**Figure S7:** <sup>1</sup>H spectrum, structure, numbering and full assignment of **verbascoside** in methanol-d<sub>4</sub> at 25 °C

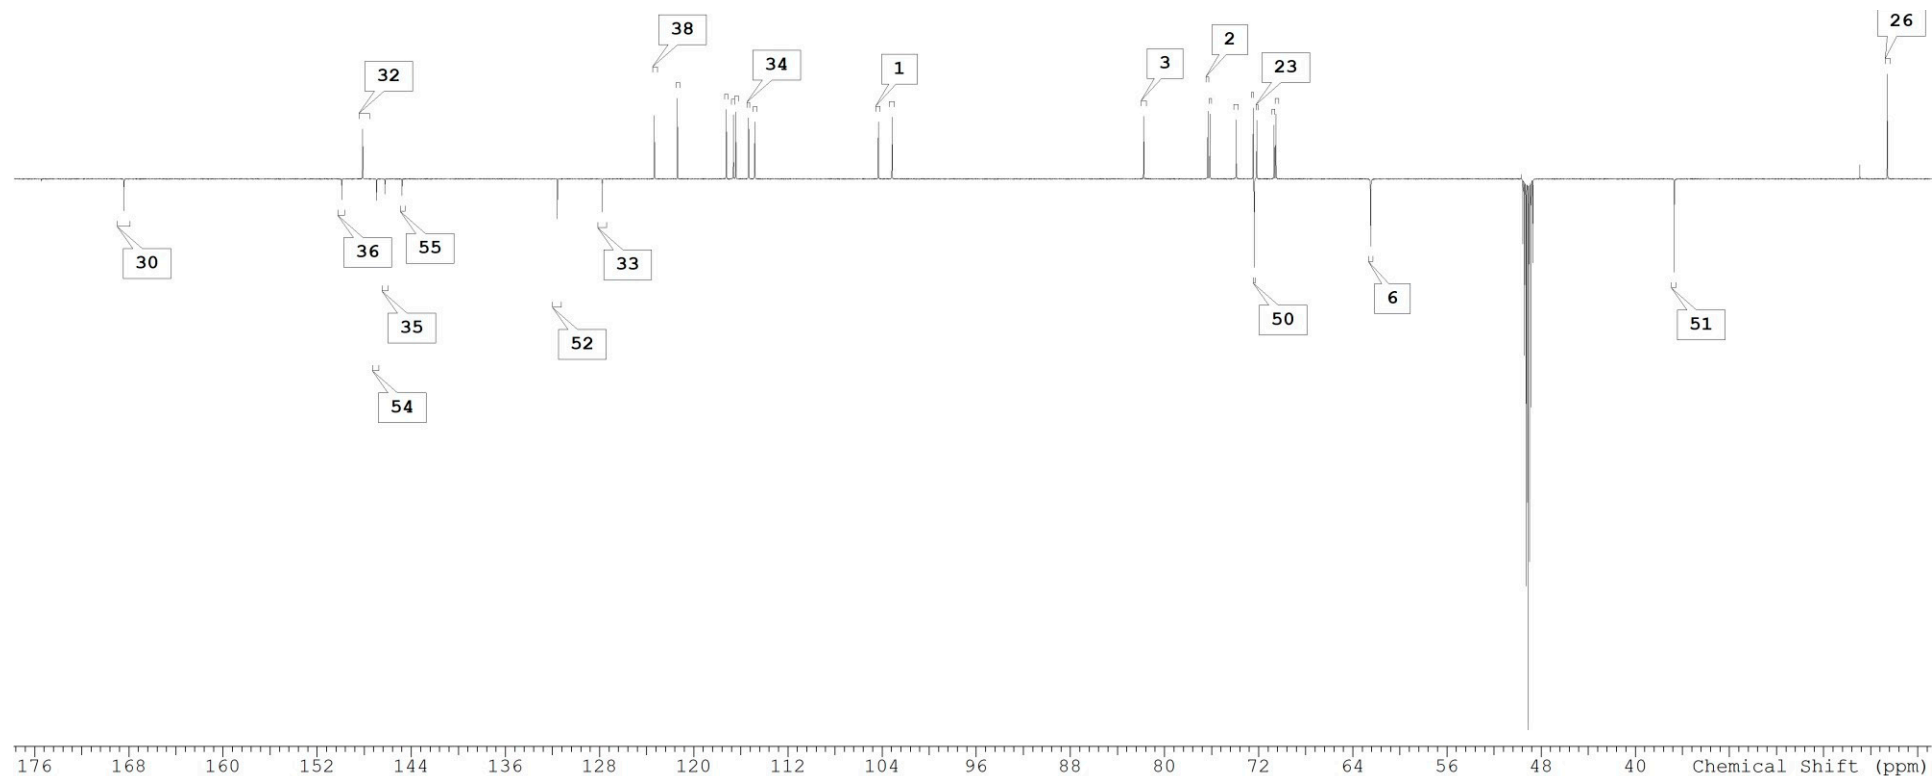

| Shift1 (ppm) | C's   | Type | Atom1 | Multiplet1 | Shift1 (ppm) | C's   | Type | Atom1 | Multiplet1 |
|--------------|-------|------|-------|------------|--------------|-------|------|-------|------------|
| 18.597       | 1.000 | s    | 26    | M29        | 115.352      | 1.000 | s    | 34    | M14        |
| 36.703       | 1.000 | s    | 51    | M28        | 116.436      | 1.000 | s    | 56    | M13        |
| 62.493       | 1.000 | s    | 6     | M27        | 116.645      | 1.000 | s    | 37    | M12        |
| 70.553       | 1.000 | s    | 25    | M25        | 117.244      | 1.000 | s    | 53    | M11        |
| 70.705       | 1.000 | s    | 4     | M24        | 121.397      | 1.000 | s    | 57    | M10        |
| 72.178       | 1.000 | s    | 23    | M23        | 123.362      | 1.000 | s    | 38    | M09        |
| 72.402       | 1.000 | s    | 50    | M26        | 127.789      | 1.000 | s    | 33    | M08        |
| 72.482       | 1.000 | s    | 22    | M22        | 131.595      | 1.000 | s    | 52    | M07        |
| 73.919       | 1.000 | s    | 24    | M21        | 144.811      | 1.000 | s    | 55    | M05        |
| 76.165       | 1.000 | s    | 5     | M20        | 146.263      | 1.000 | s    | 35    | M04        |
| 76.338       | 1.000 | s    | 2     | M19        | 146.964      | 1.000 | s    | 54    | M03        |
| 81.784       | 1.000 | s    | 3     | M18        | 148.155      | 1.000 | s    | 32    | M06        |
| 103.168      | 1.000 | s    | 21    | M17        | 149.925      | 1.000 | s    | 36    | M02        |
| 104.338      | 1.000 | s    | 1     | M16        | 168.428      | 1.000 | s    | 30    | M01        |
| 114.832      | 1.000 | s    | 31    | M15        |              |       |      |       |            |

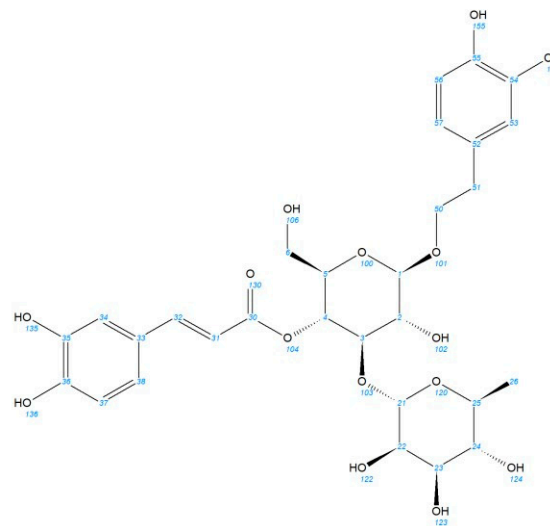

Solvent **METHANOL-d<sub>4</sub>**  
 Pulse Sequence **deptqgppsp**  
 Temperature (degree C) **25.000**  
 Acquisition Time (sec) **0.9175**  
 Number of Transients **3072**  
 Points Count **32768**  
 Sweep Width (Hz) **35713.20**  
 Spectrum Offset (Hz) **15322.5537**  
 Original Points Count **32768**  
 Nucleus **13C**  
 Frequency (MHz) **150.9126**

**Figure S8:** <sup>13</sup>C spectrum, structure, numbering and full assignment of **verbascoside** in methanol-d<sub>4</sub> at 25 °C



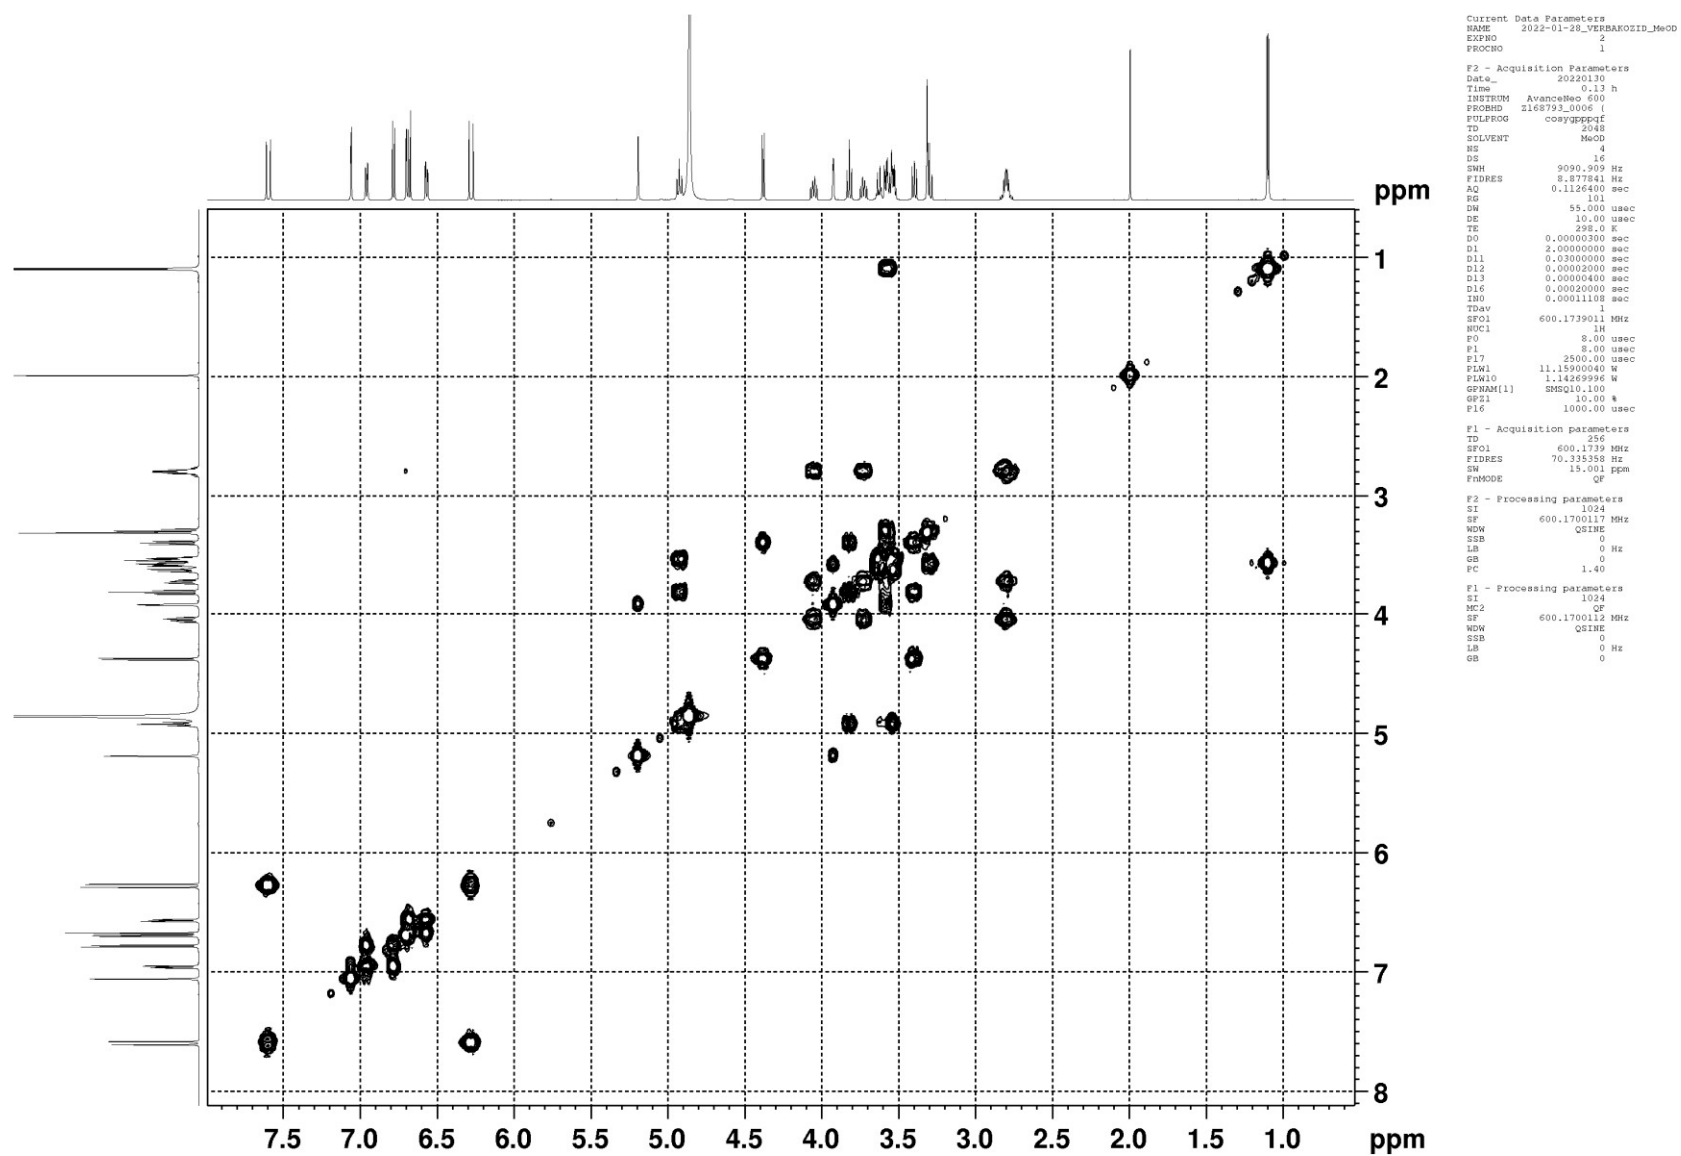

Figure S9: COSY spectrum of **verbascoside** in methanol- $d_4$  at 25 °C



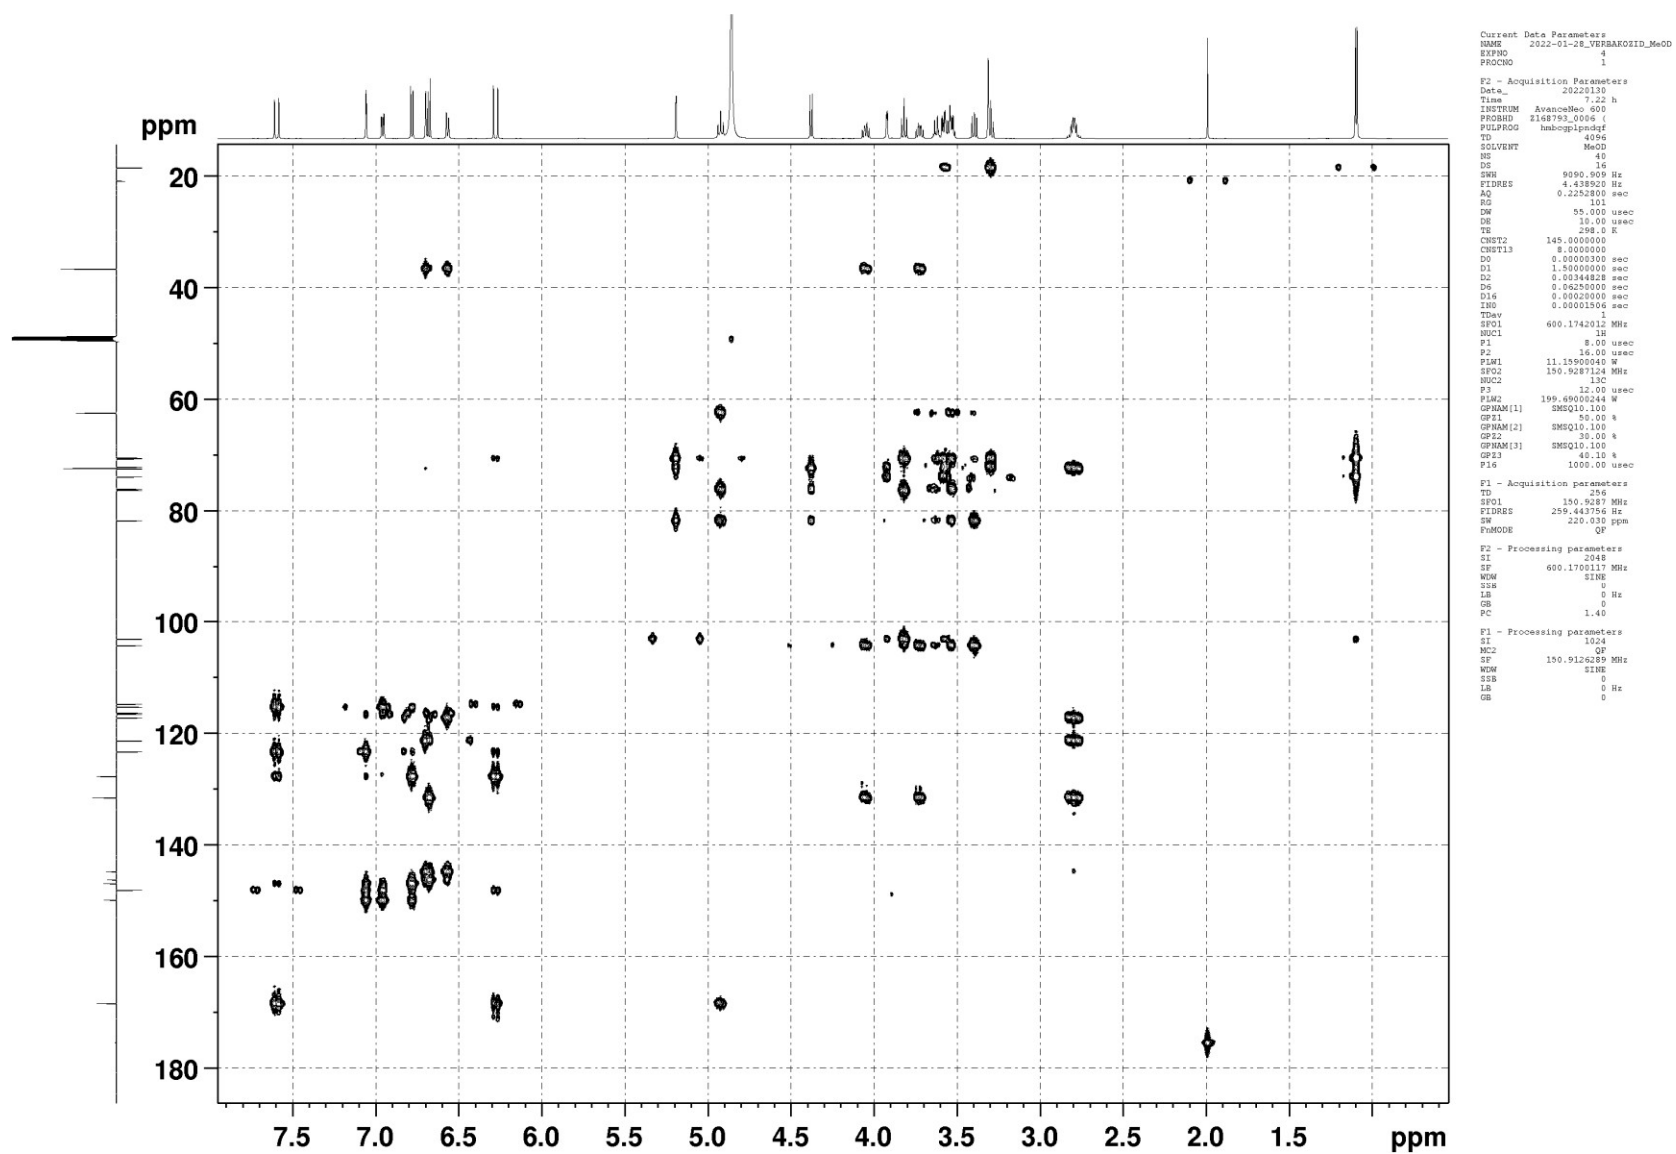

Figure S11:  $^1\text{H}$ - $^{13}\text{C}$  HMBC spectrum of verbascoside in methanol- $\text{d}_4$  at 25 °C

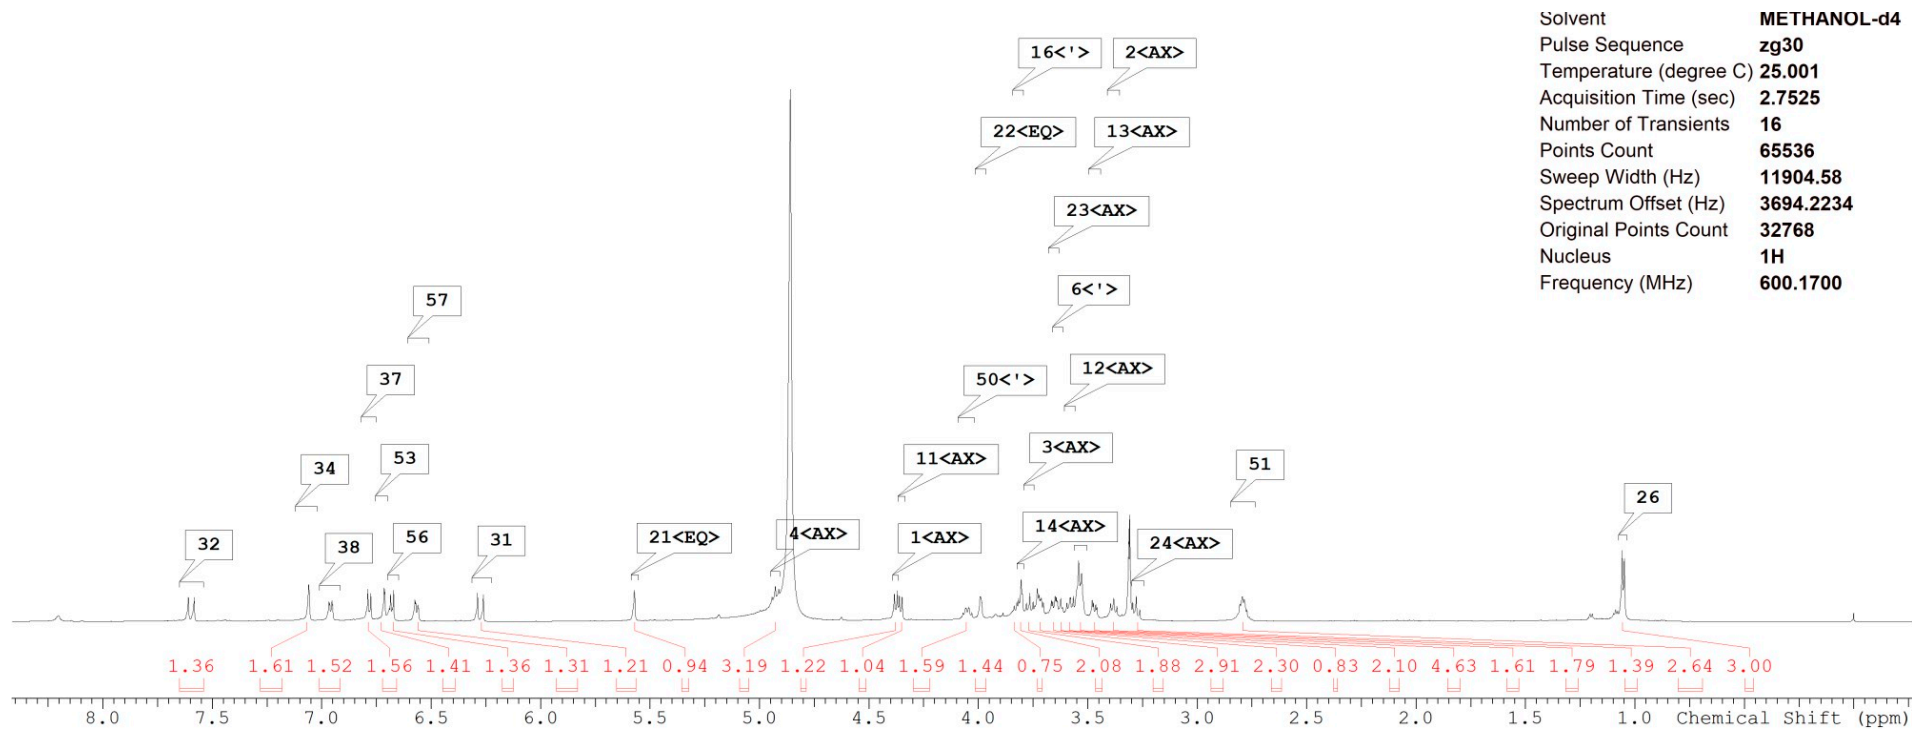

| Shift1 (ppm) | H's   | Type  | J (Hz)        | Atom1                       | Multiplet1 | Shift1 (ppm) | H's   | Type  | J (Hz)   | Atom1  | Multiplet1 |
|--------------|-------|-------|---------------|-----------------------------|------------|--------------|-------|-------|----------|--------|------------|
| 1.054        | 3.000 | br d  | 6.0           | 26                          | M15        | 4.355        | 1.000 | br d  | 7.6      | 11<AX> | M12        |
| 2.792        | 2.000 | m     | -             | 51                          | M16        | 4.378        | 1.000 | br d  | 8.0      | 1<AX>  | M11        |
| 3.279        | 1.000 | br t  | 9.6           | 24<AX>                      | M17        | 4.928        | 1.000 | br t  | 9.3      | 4<AX>  | M10        |
| 3.382        | 1.000 | br t  | 9.1           | 2<AX>                       | M18        | 5.573        | 1.000 | s     | -        | 21<EQ> | M09        |
| 3.470        | 1.000 | br dd | 9.7, 3.4      | 13<AX>                      | M19        | 6.276        | 1.000 | br d  | 15.8     | 31     | M02        |
| 3.536        | 4.000 | m     | -             | 5<AX>, 6<'>, 25<AX>, 15<AX> | M21        | 6.567        | 1.000 | dd    | 8.0, 1.8 | 57     | M08        |
| 3.582        | 1.000 | br dd | 9.6, 7.8      | 12<AX>                      | M20        | 6.680        | 1.000 | br d  | 8.0      | 56     | M07        |
| 3.635        | 1.000 | br d  | -             | 6<'>                        | M22        | 6.714        | 1.000 | br d  | 1.8      | 53     | M06        |
| 3.656        | 1.000 | br dd | 9.9, 3.4      | 23<AX>                      | M23        | 6.784        | 1.000 | br d  | 8.2      | 37     | M05        |
| 3.722        | 2.000 | m     | -             | 50<'>, 16<'>                | M25        | 6.959        | 1.000 | br dd | 8.2, 1.8 | 38     | M04        |
| 3.766        | 1.000 | br t  | 9.3           | 3<AX>                       | M24        | 7.059        | 1.000 | br d  | 1.8      | 34     | M03        |
| 3.805        | 1.000 | br s  | 3.4           | 14<AX>                      | M27        | 7.598        | 1.000 | br d  | 15.8     | 32     | M01        |
| 3.820        | 1.000 | br dd | 11.4, 7.3     | 16<'>                       | M26        |              |       |       |          |        |            |
| 3.990        | 1.000 | br dd | 3.1, 1.3      | 22<EQ>                      | M14        |              |       |       |          |        |            |
| 4.052        | 1.000 | m     | 9.4, 7.8, 6.7 | 50<'>                       | M13        |              |       |       |          |        |            |

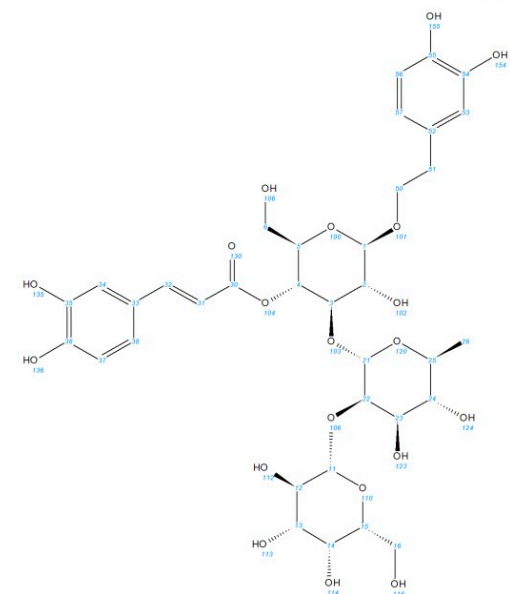

**Figure S12:** <sup>1</sup>H spectrum, structure, numbering and full assignment of **PH5** in methanol-d<sub>4</sub> at 25 °C

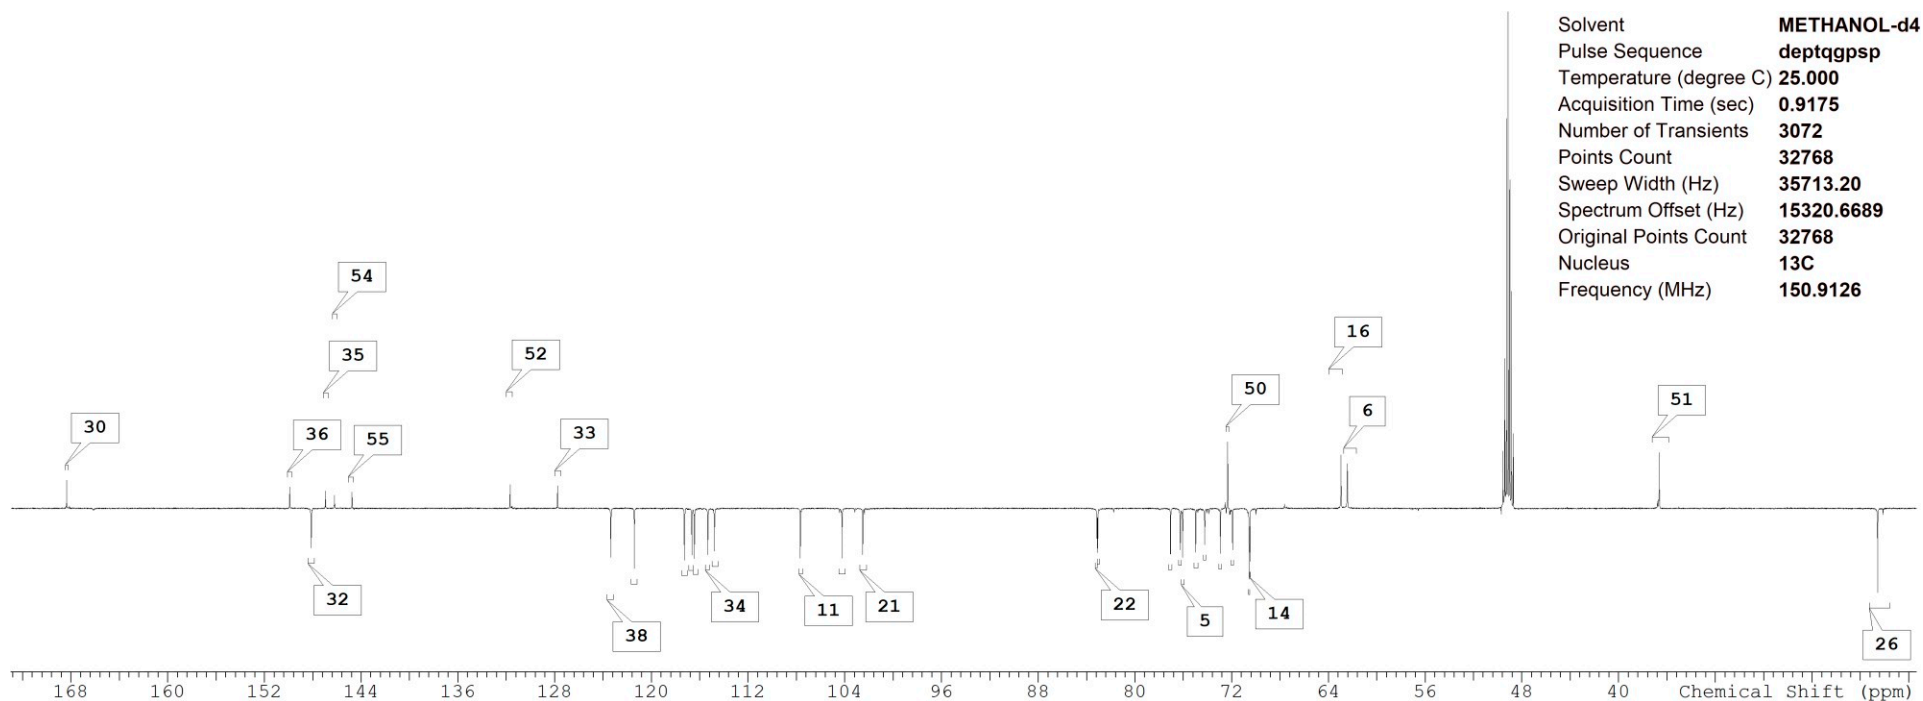

| Shift1 (ppm) | C's   | Type | Atom1 | Multiplet1 | Shift1 (ppm) | C's   | Type | Atom1 | Multiplet1 | Shift1 (ppm) | C's   | Type | Atom1 | Multiplet1 |
|--------------|-------|------|-------|------------|--------------|-------|------|-------|------------|--------------|-------|------|-------|------------|
| 18.577       | 1.000 | s    | 26    | M31        | 83.151       | 1.000 | s    | 22    | M19        | 146.965      | 1.000 | s    | 35    | M03        |
| 36.640       | 1.000 | s    | 51    | M32        | 102.528      | 1.000 | s    | 21    | M18        | 148.143      | 1.000 | s    | 32    | M08        |
| 62.445       | 1.000 | s    | 6     | M33        | 104.239      | 1.000 | s    | 1     | M17        | 149.927      | 1.000 | s    | 36    | M02        |
| 62.979       | 1.000 | s    | 16    | M34        | 107.691      | 1.000 | s    | 11    | M16        | 168.379      | 1.000 | s    | 30    | M01        |
| 70.497       | 1.000 | s    | 14    | M29        | 114.784      | 1.000 | s    | 31    | M15        |              |       |      |       |            |
| 70.548       | 2.000 | s    | 4, 25 | M30        | 115.332      | 1.000 | s    | 34    | M14        |              |       |      |       |            |
| 71.942       | 1.000 | s    | 23    | M27        | 116.445      | 1.000 | s    | 56    | M13        |              |       |      |       |            |
| 72.346       | 1.000 | s    | 50    | M28        | 116.661      | 1.000 | s    | 37    | M12        |              |       |      |       |            |
| 72.953       | 1.000 | s    | 12    | M26        | 117.290      | 1.000 | s    | 53    | M11        |              |       |      |       |            |
| 74.246       | 1.000 | s    | 24    | M25        | 121.428      | 1.000 | s    | 57    | M10        |              |       |      |       |            |
| 74.990       | 1.000 | s    | 13    | M24        | 123.363      | 1.000 | s    | 38    | M09        |              |       |      |       |            |
| 76.073       | 1.000 | s    | 5     | M23        | 127.776      | 1.000 | s    | 33    | M07        |              |       |      |       |            |
| 76.261       | 1.000 | s    | 2     | M22        | 131.698      | 1.000 | s    | 52    | M06        |              |       |      |       |            |
| 77.070       | 1.000 | s    | 15    | M21        | 144.777      | 1.000 | s    | 55    | M05        |              |       |      |       |            |
| 83.093       | 1.000 | s    | 3     | M20        | 146.222      | 1.000 | s    | 54    | M04        |              |       |      |       |            |

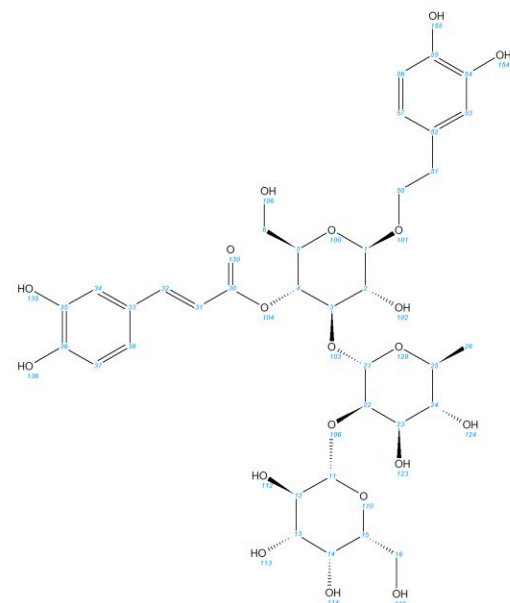

**Figure S13:** <sup>13</sup>C spectrum, structure, numbering and full assignment of **PH5** in methanol-d<sub>4</sub> at 25 °C



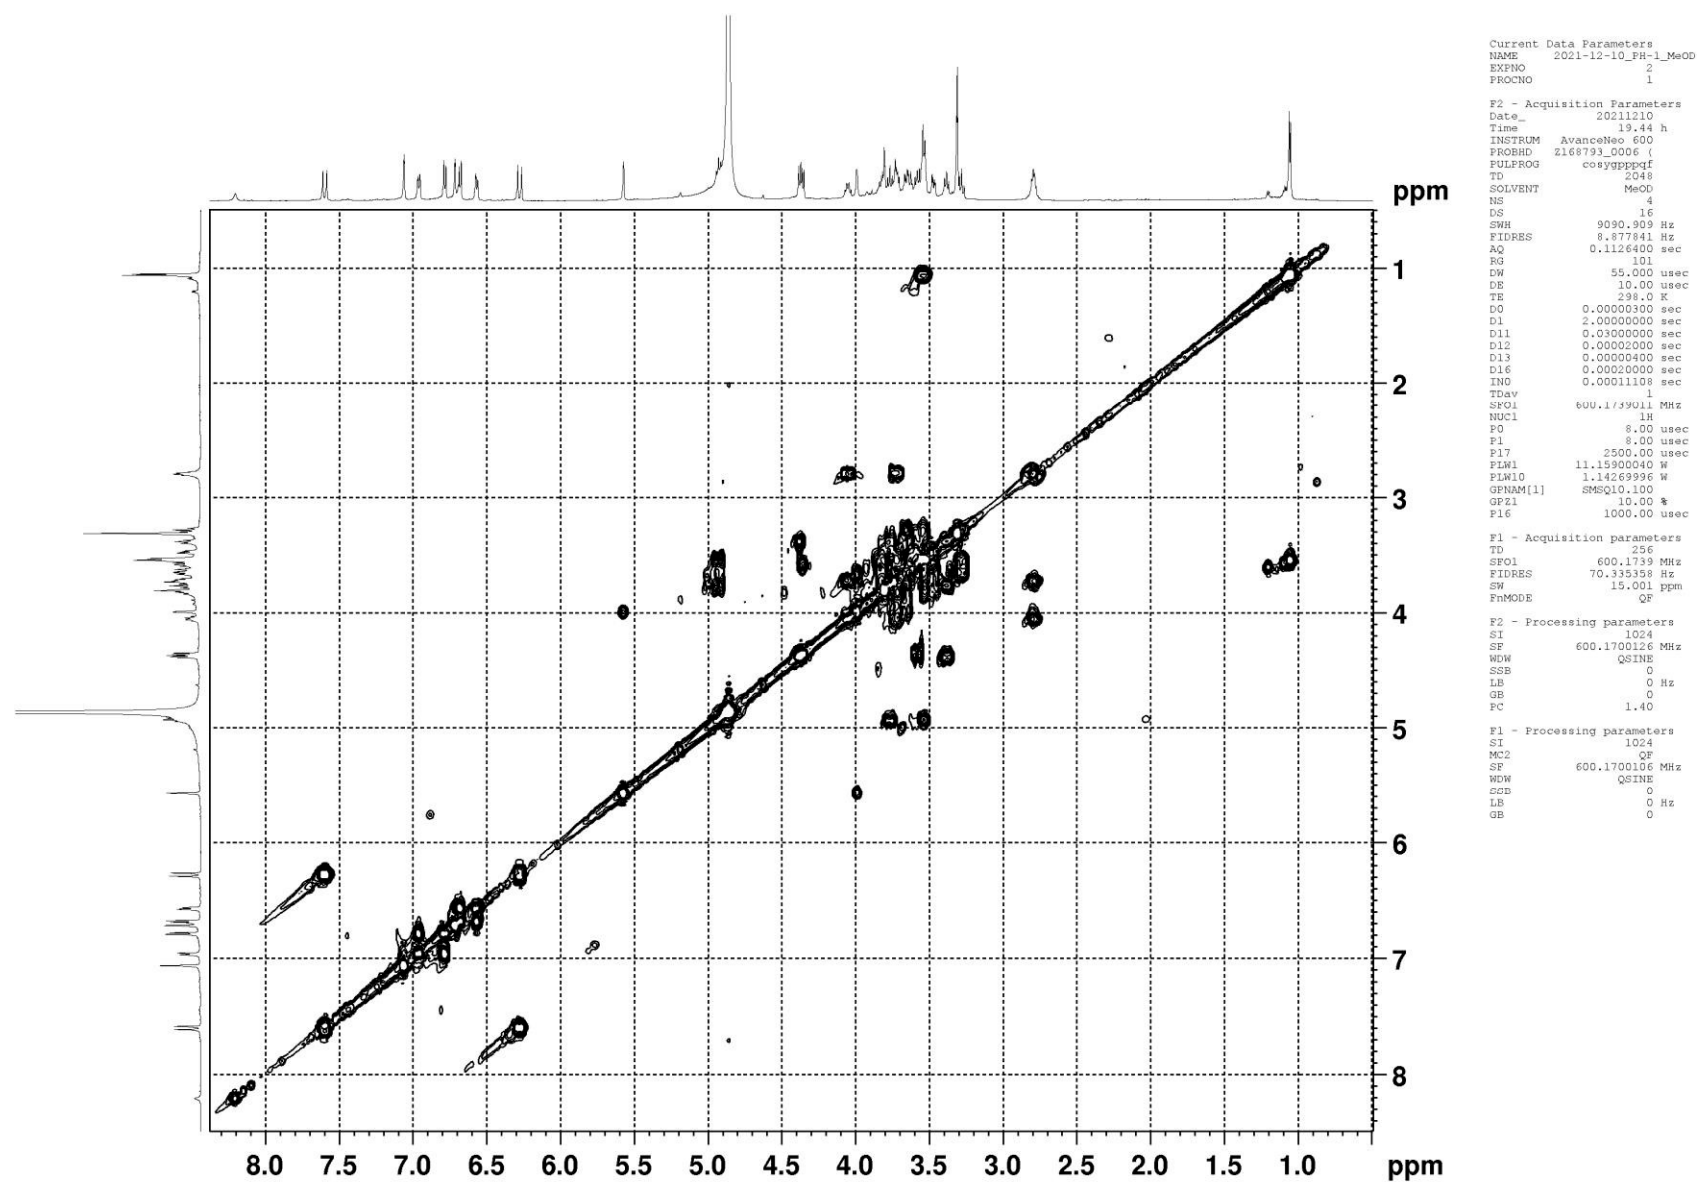

**Figure S14:** COSY spectrum of **PH5** in methanol- $d_4$  at 25 °C



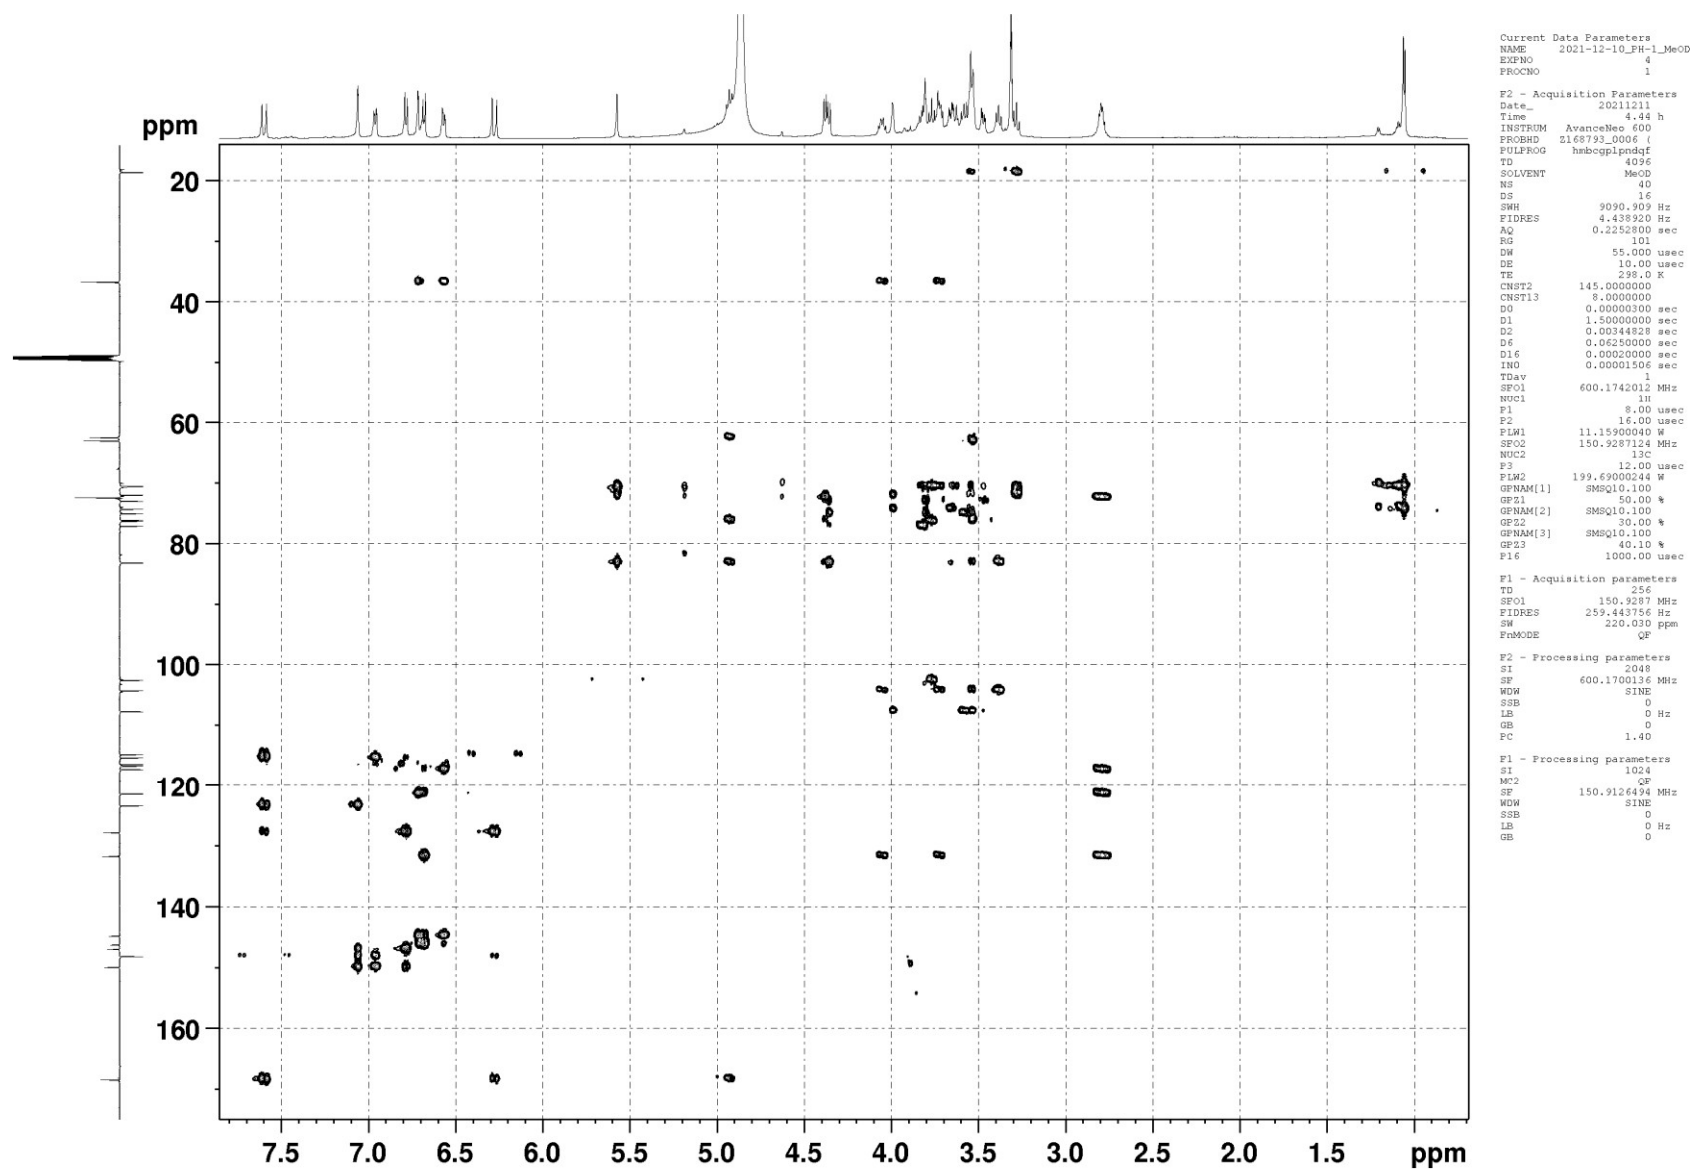

Figure S16:  $^1\text{H}$ - $^{13}\text{C}$  HMBC spectrum of **PH5** in methanol- $d_4$  at 25 °C



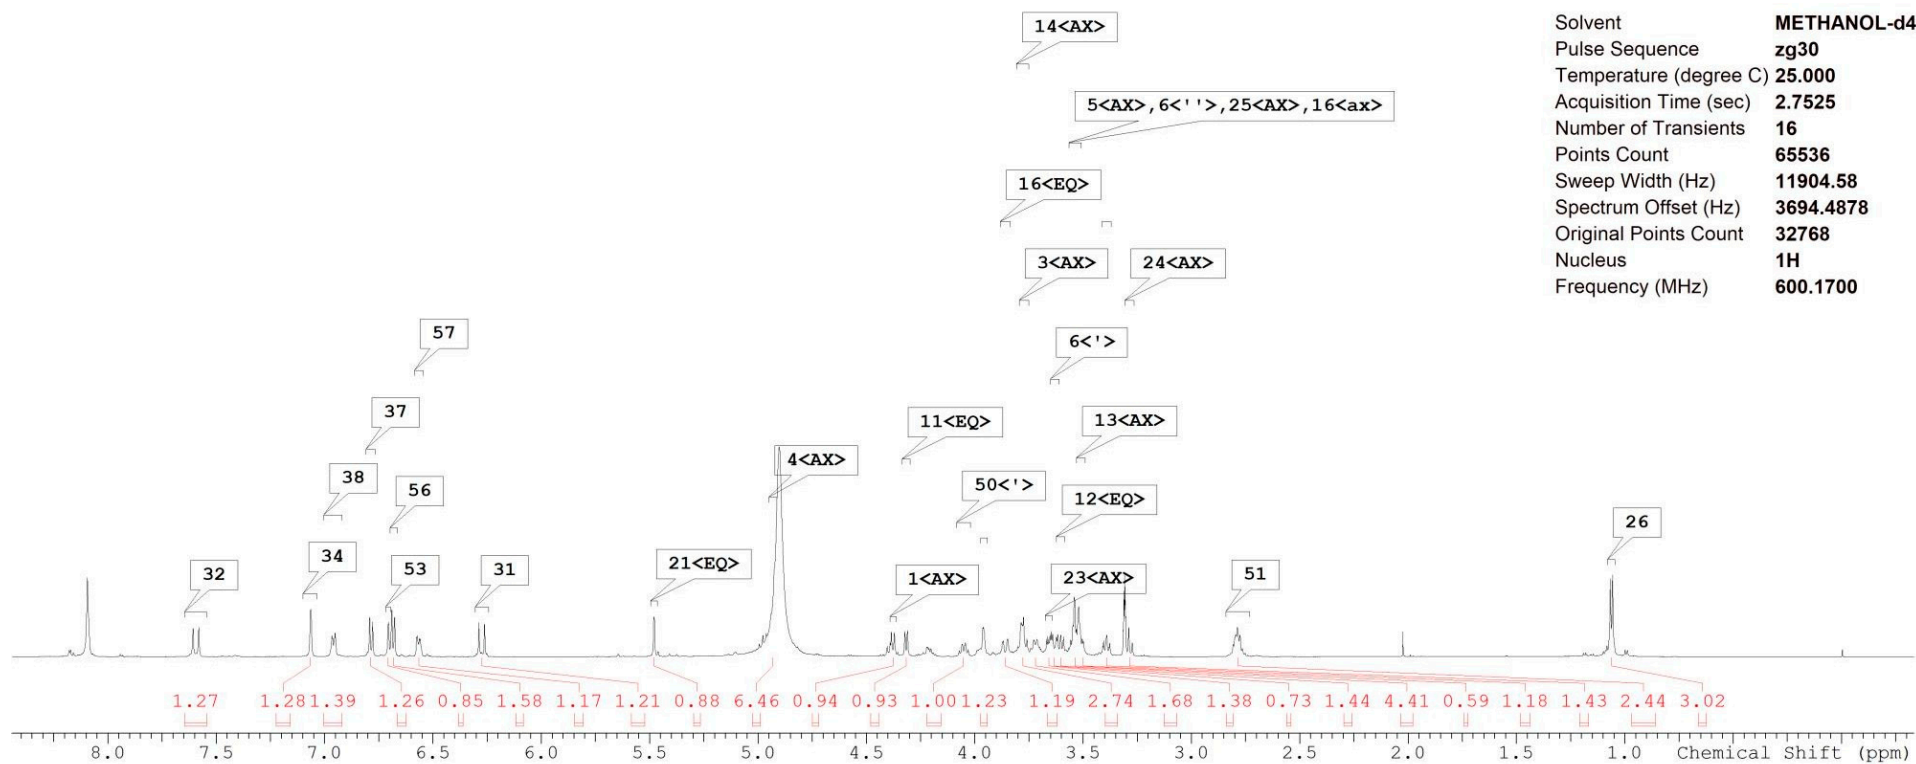

| Shift1 (ppm) | H's   | Type  | J (Hz)    | Atom1                       | Multiplet1 | Shift1 (ppm) | H's   | Type  | J (Hz)   | Atom1  | Multiplet1 |
|--------------|-------|-------|-----------|-----------------------------|------------|--------------|-------|-------|----------|--------|------------|
| 1.063        | 3.000 | br d  | 6.2       | 26                          | M27        | 4.317        | 1.000 | d     | 7.3      | 11<EQ> | M12        |
| 2.787        | 2.000 | m     | -         | 51                          | M26        | 4.379        | 1.000 | br d  | 7.8      | 1<AX>  | M11        |
| 3.290        | 1.000 | t     | 9.6       | 24<AX>                      | M25        | 4.925        | 1.000 | br s  | 9.3      | 4<AX>  | M10        |
| 3.392        | 1.000 | br t  | 9.3, 7.8  | 2<AX>                       | M24        | 5.482        | 1.000 | s     | -        | 21<EQ> | M09        |
| 3.510        | 1.000 | br dd | 9.0, 3.3  | 13<AX>                      | M23        | 6.276        | 1.000 | d     | 15.8     | 31     | M08        |
| 3.540        | 4.000 | m     | -         | 5<AX>, 6<'>, 25<AX>, 16<ax> | M22        | 6.568        | 1.000 | br dd | 8.0, 1.8 | 57     | M07        |
| 3.605        | 1.000 | br dd | 9.0, 7.4  | 12<EQ>                      | M21        | 6.684        | 1.000 | d     | 8.0      | 56     | M06        |
| 3.633        | 1.000 | br dd | 13.6, 3.5 | 6<'>                        | M19        | 6.707        | 1.000 | d     | 1.6      | 53     | M05        |
| 3.658        | 1.000 | br dd | 9.6, 3.3  | 23<AX>                      | M20        | 6.786        | 1.000 | d     | 8.2      | 37     | M04        |
| 3.720        | 1.000 | q     | 9.4       | 50<'>                       | M18        | 6.958        | 1.000 | br dd | 8.1, 1.9 | 38     | M03        |
| 3.775        | 1.000 | br t  | 9.3       | 3<AX>                       | M16        | 7.065        | 1.000 | s     | -        | 34     | M02        |
| 3.783        | 1.000 | br s  | -         | 14<AX>                      | M17        | 7.594        | 1.000 | br d  | 15.8     | 32     | M01        |
| 3.860        | 1.000 | br dd | 12.8, 2.1 | 16<EQ>                      | M15        |              |       |       |          |        |            |
| 3.961        | 1.000 | br dd | 3.0, 1.5  | 22<EQ>                      | M14        |              |       |       |          |        |            |
| 4.052        | 1.000 | q     | 8.4       | 50<'>                       | M13        |              |       |       |          |        |            |

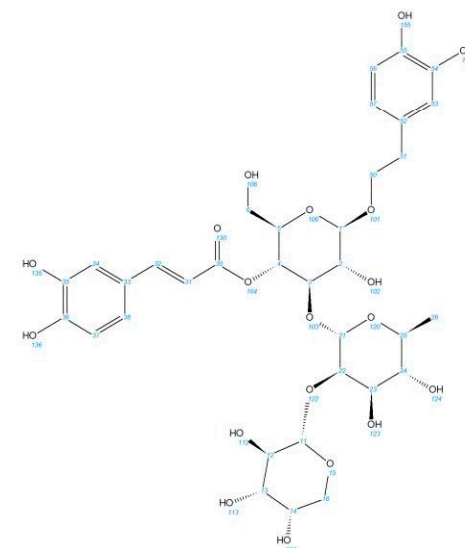

**Figure S18:** <sup>1</sup>H spectrum, structure, numbering and full assignment of PH6 in methanol-d<sub>4</sub> at 25 °C



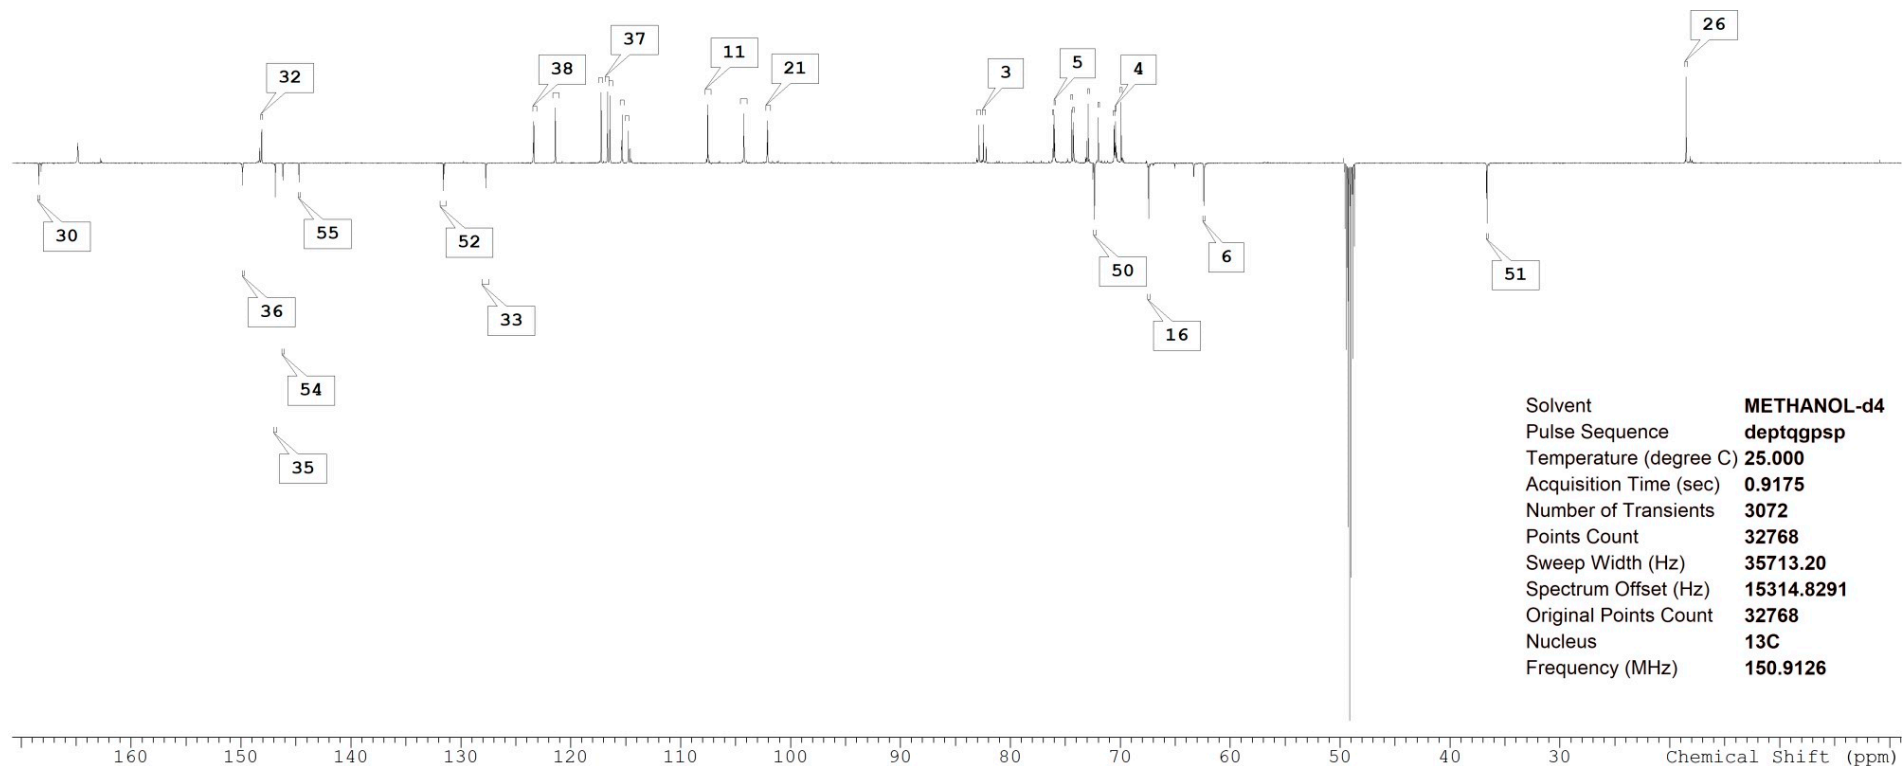

| Shift1 (ppm) | C's   | Type | Atom1 | Multiplet1 | Shift1 (ppm) | C's   | Type | Atom1 | Multiplet1 | Shift1 (ppm) | C's   | Type | Atom1 | Multiplet1 |
|--------------|-------|------|-------|------------|--------------|-------|------|-------|------------|--------------|-------|------|-------|------------|
| 18.546       | 1.000 | s    | 26    | M34        | 82.888       | 1.000 | s    | 22    | M19        | 146.898      | 1.000 | s    | 35    | M03        |
| 36.652       | 1.000 | s    | 51    | M33        | 102.106      | 1.000 | s    | 21    | M18        | 148.133      | 1.000 | s    | 32    | M06        |
| 62.413       | 1.000 | s    | 6     | M32        | 104.258      | 1.000 | s    | 1     | M17        | 149.859      | 1.000 | s    | 36    | M02        |
| 67.440       | 1.000 | s    | 16    | M31        | 107.552      | 1.000 | s    | 11    | M16        | 168.420      | 1.000 | s    | 30    | M01        |
| 69.953       | 1.000 | s    | 14    | M30        | 114.781      | 1.000 | s    | 31    | M15        |              |       |      |       |            |
| 70.451       | 1.000 | s    | 4     | M29        | 115.352      | 1.000 | s    | 34    | M14        |              |       |      |       |            |
| 70.574       | 1.000 | s    | 25    | M28        | 116.442      | 1.000 | s    | 56    | M13        |              |       |      |       |            |
| 72.019       | 1.000 | s    | 23    | M27        | 116.659      | 1.000 | s    | 37    | M12        |              |       |      |       |            |
| 72.286       | 1.000 | m    | 50    | M26        | 117.258      | 1.000 | s    | 53    | M11        |              |       |      |       |            |
| 72.936       | 1.000 | s    | 12    | M25        | 121.418      | 1.000 | s    | 57    | M10        |              |       |      |       |            |
| 74.294       | 1.000 | s    | 24    | M24        | 123.375      | 1.000 | s    | 38    | M09        |              |       |      |       |            |
| 74.438       | 1.000 | s    | 13    | M23        | 127.752      | 1.000 | s    | 33    | M08        |              |       |      |       |            |
| 76.034       | 1.000 | s    | 5     | M22        | 131.616      | 1.000 | s    | 52    | M07        |              |       |      |       |            |
| 76.114       | 1.000 | s    | 2     | M21        | 144.731      | 1.000 | s    | 55    | M05        |              |       |      |       |            |
| 82.484       | 1.000 | s    | 3     | M20        | 146.190      | 1.000 | s    | 54    | M04        |              |       |      |       |            |

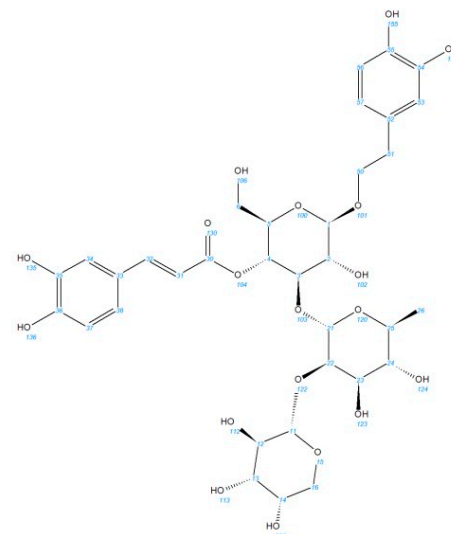

**Figure S19:**  $^{13}\text{C}$  spectrum, structure, numbering and full assignment of **PH6** in methanol- $\text{d}_4$  at 25  $^{\circ}\text{C}$

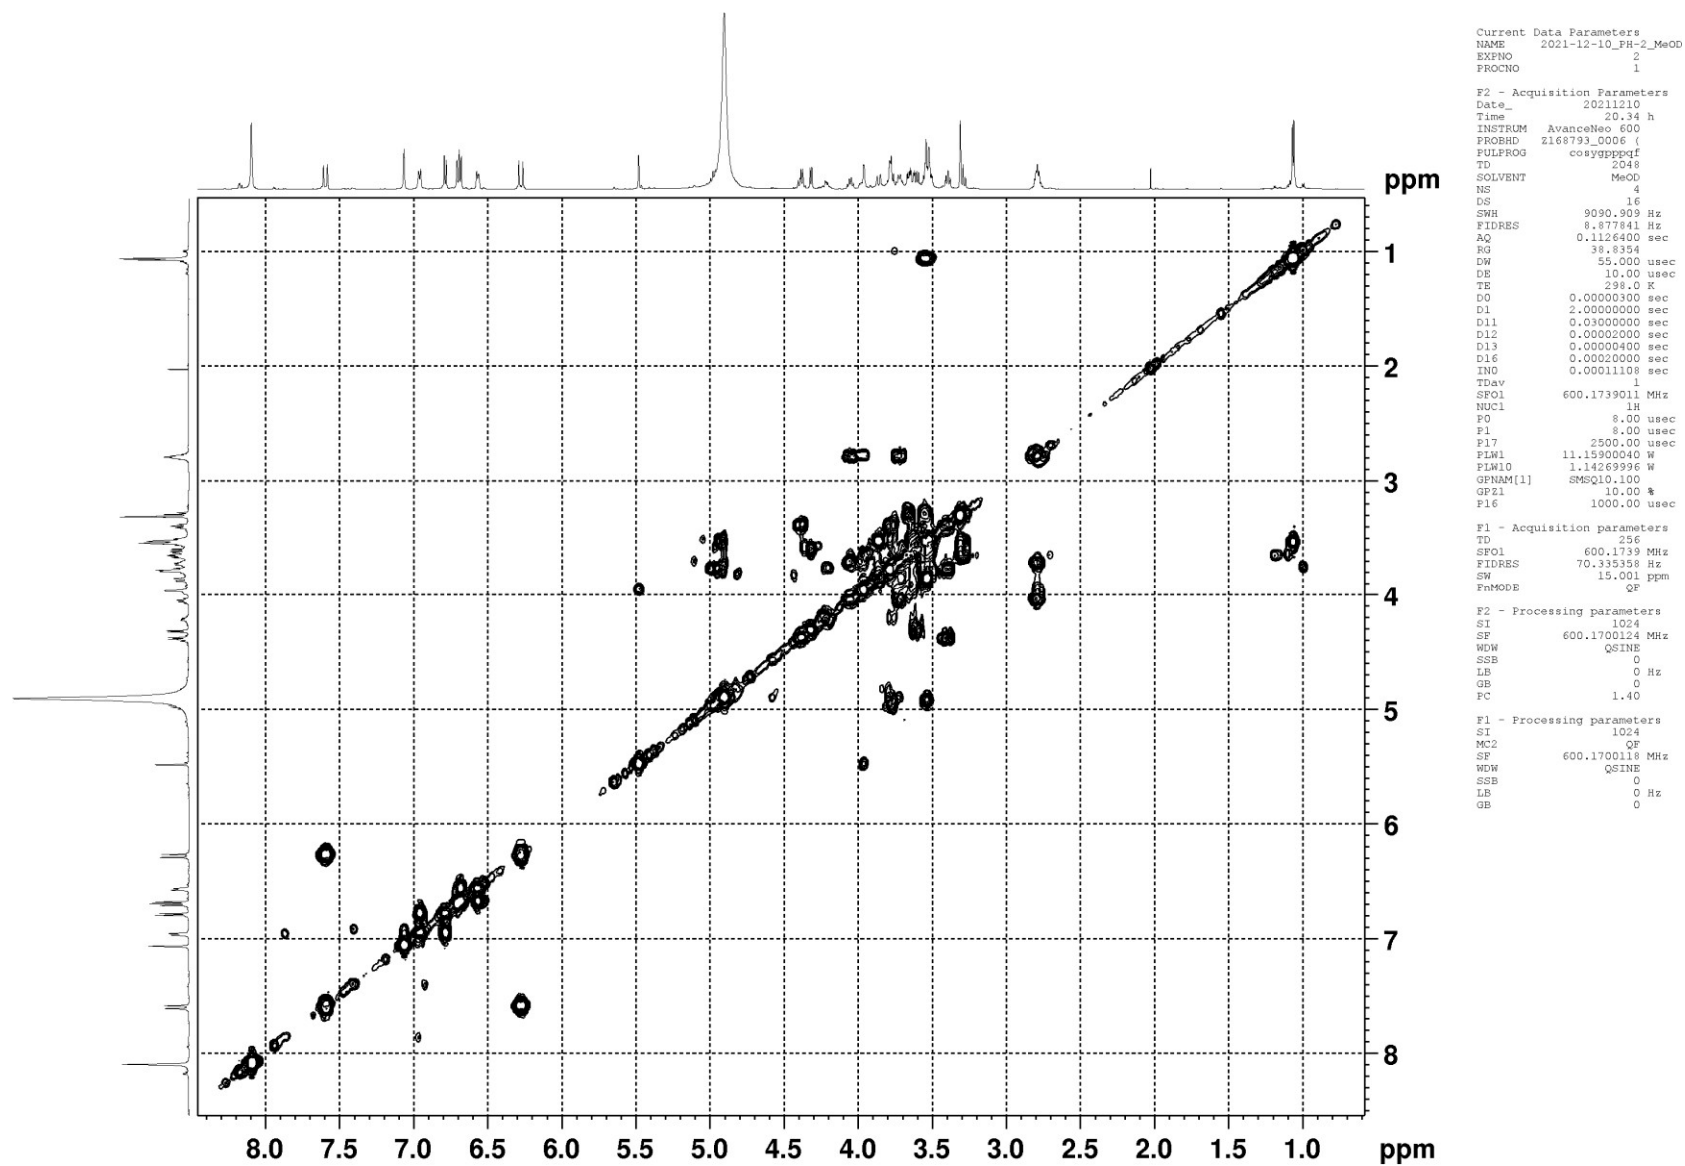

Figure S20: COSY spectrum of PH6 in methanol-d<sub>4</sub> at 25 °C



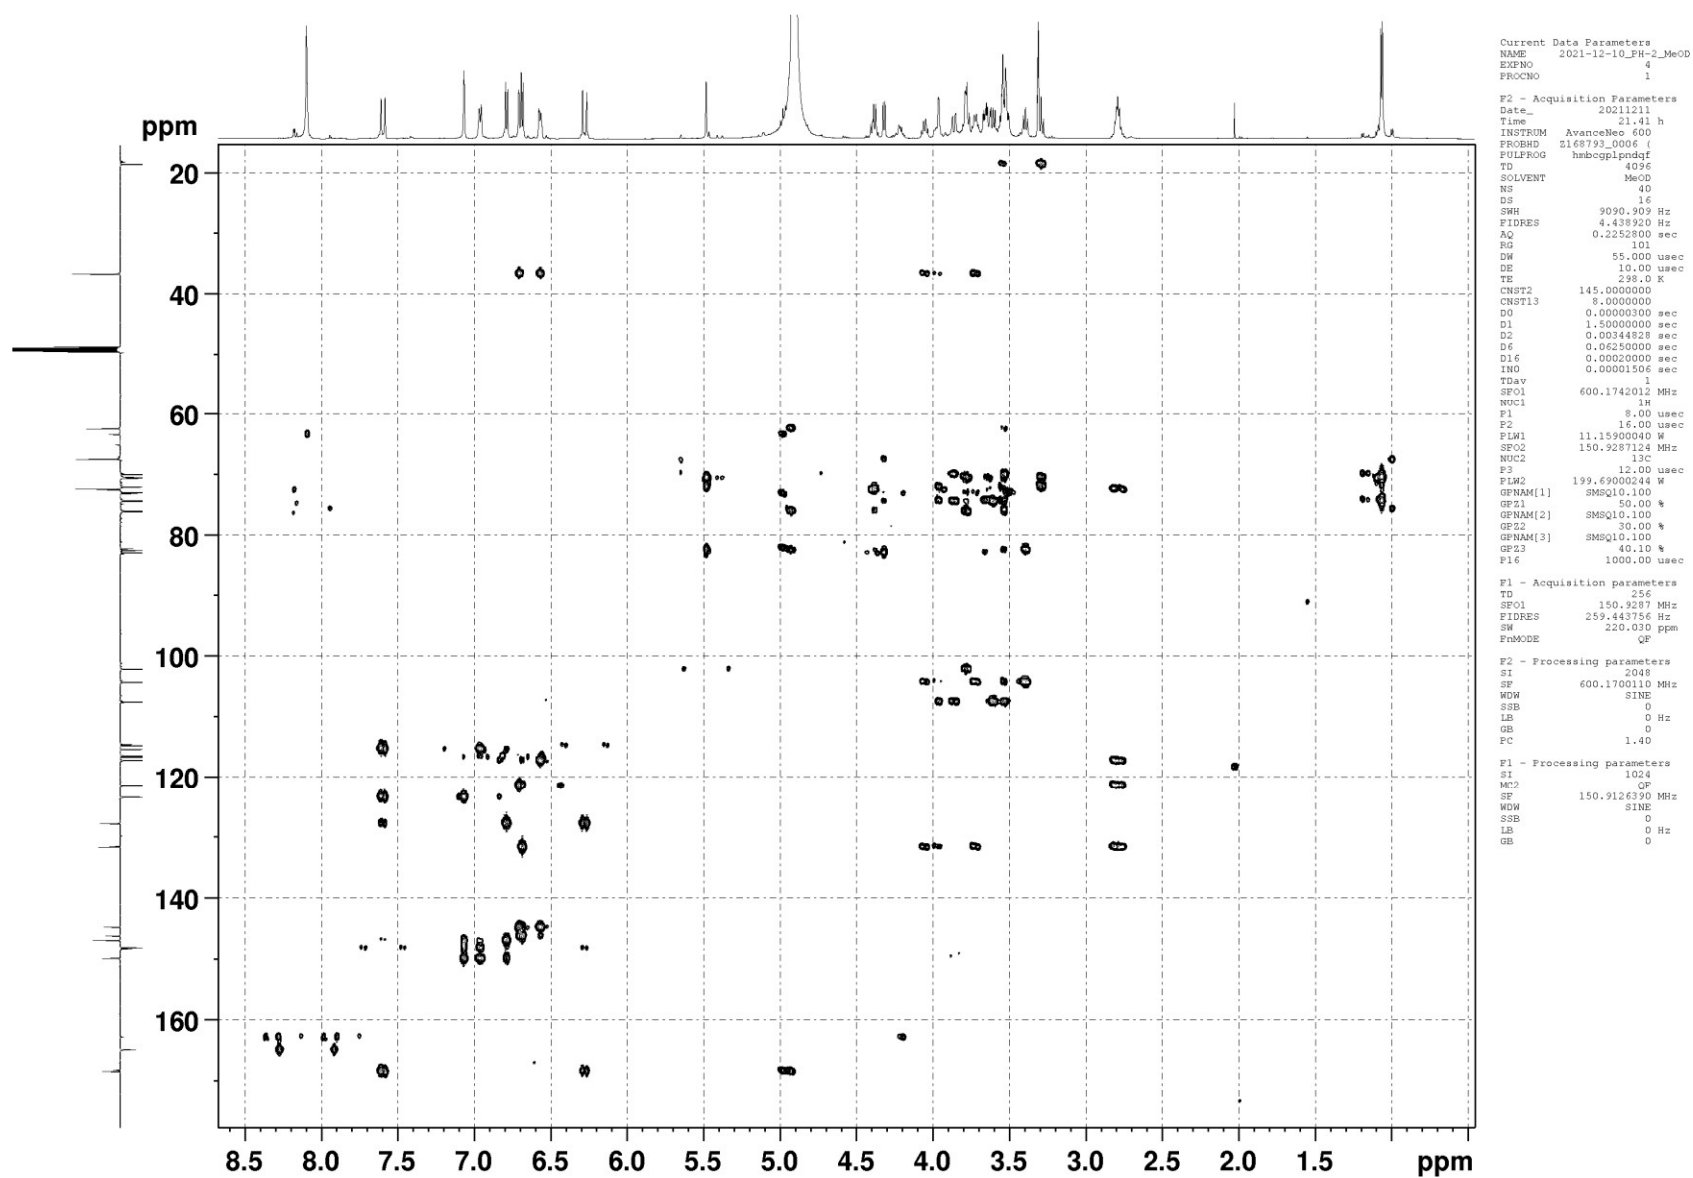

Figure S22:  $^1\text{H}$ - $^{13}\text{C}$  HMBC spectrum of **PH6** in methanol- $\text{d}_4$  at 25 °C

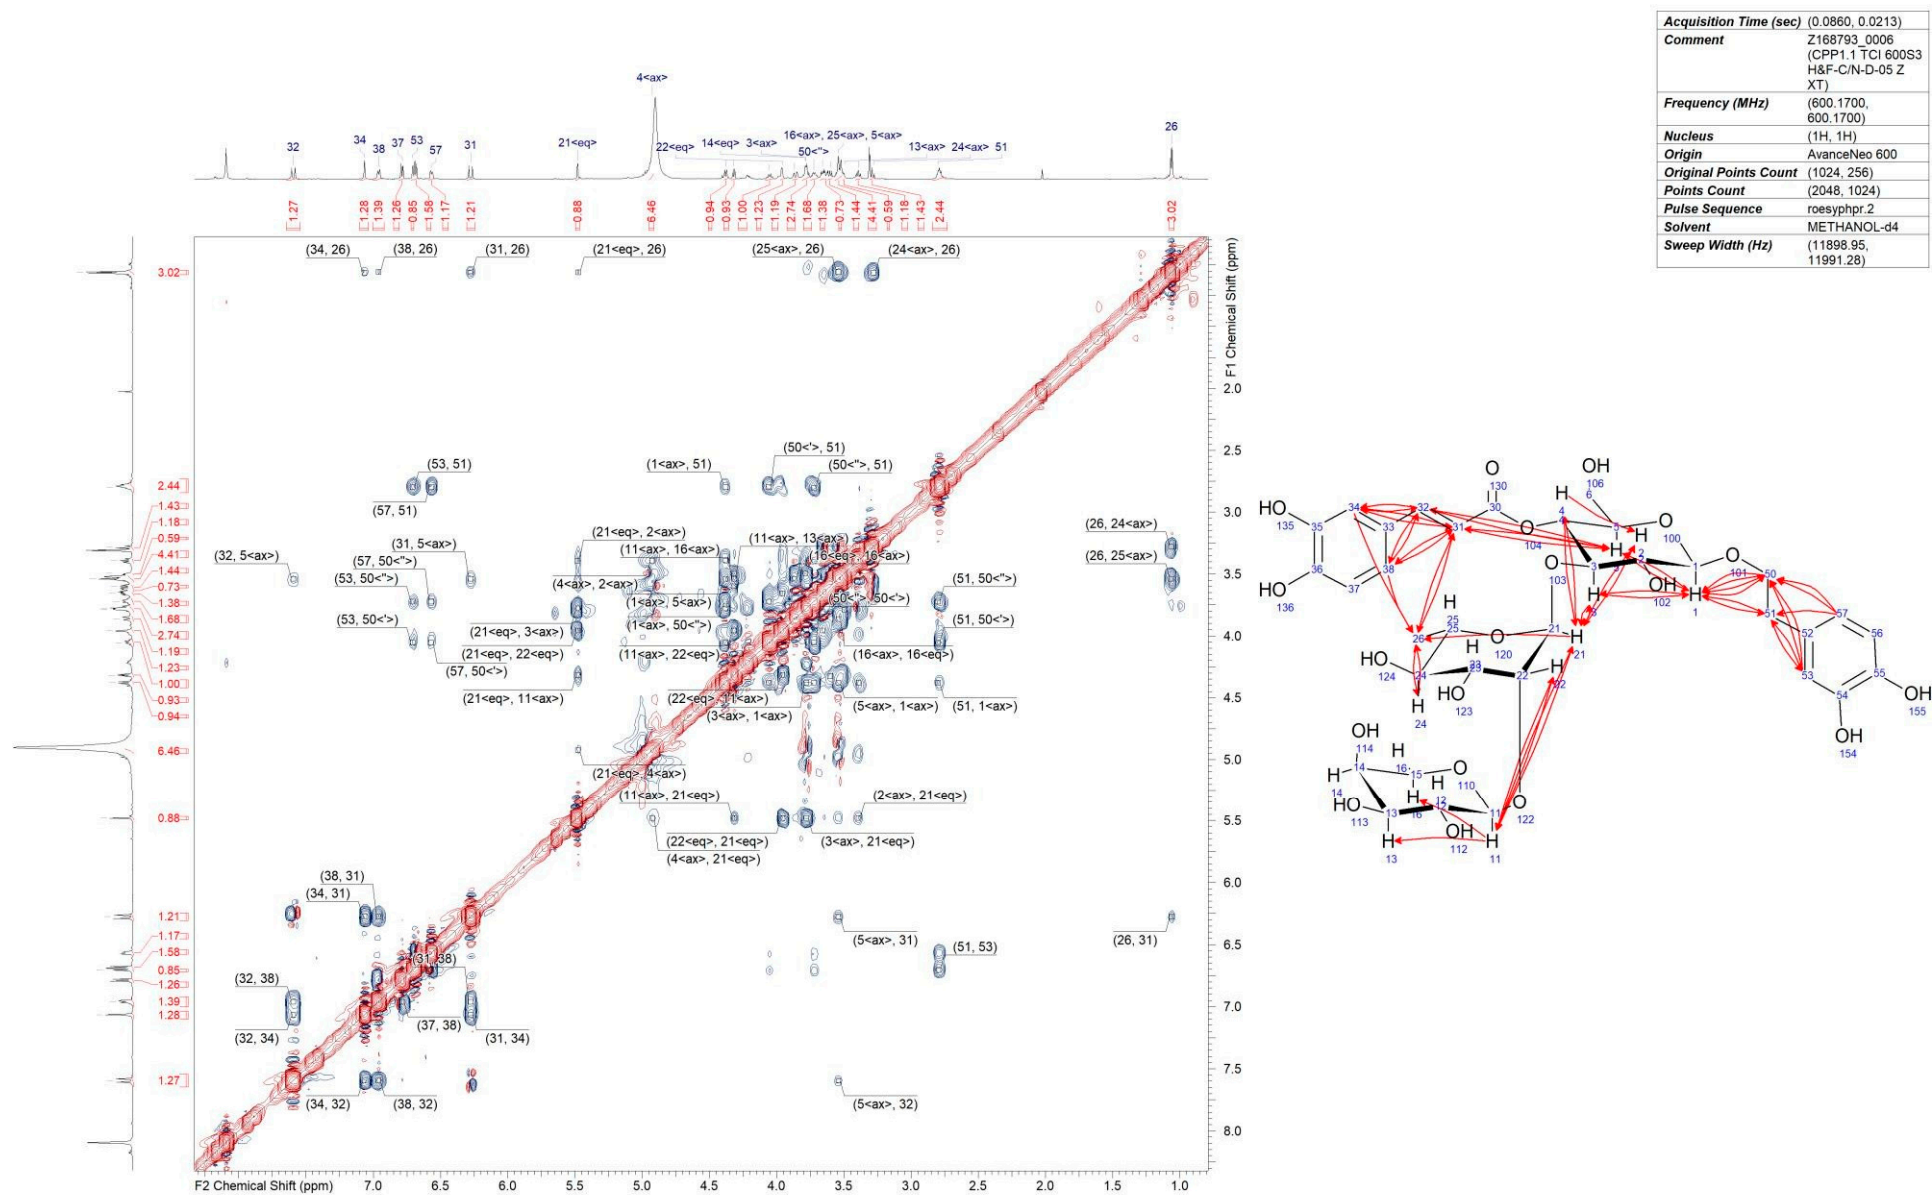

**Figure S23:** Fully assigned NOESY spectrum of **PH6** in methanol-d<sub>4</sub> at 25 °C



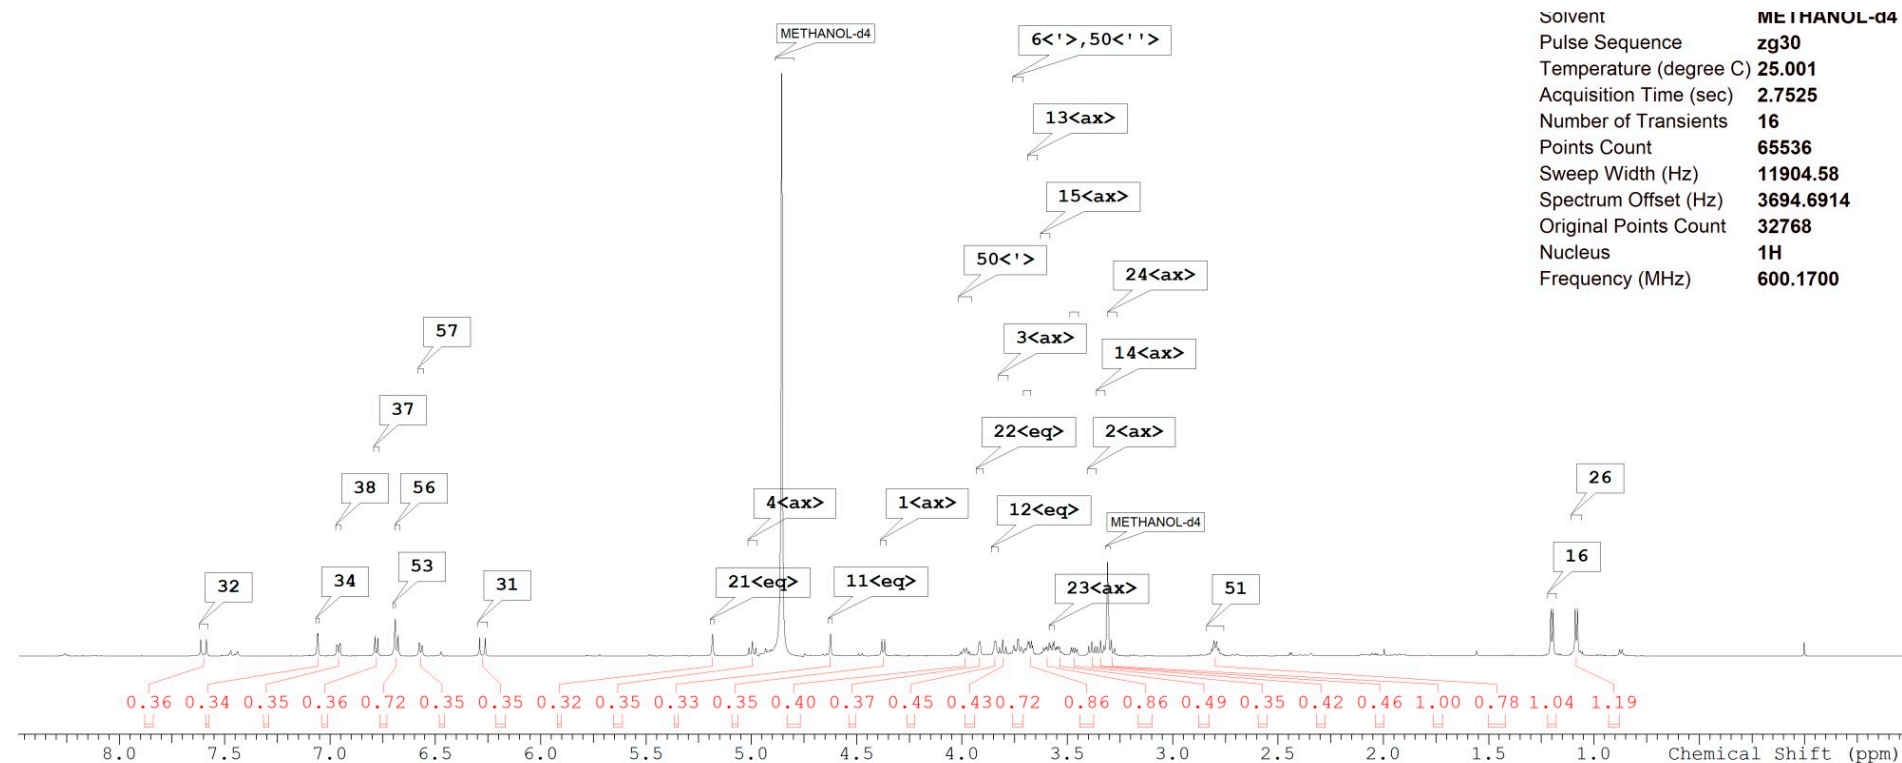

| Shift1 (ppm) | H's   | Type  | J (Hz)        | Connected Atoms | Atom1       | Multiplet1 | Shift1 (ppm) | H's   | Type | J (Hz)        | Connected Atoms | Atom1  | Multiplet1 |
|--------------|-------|-------|---------------|-----------------|-------------|------------|--------------|-------|------|---------------|-----------------|--------|------------|
| 1.085        | 3.000 | d     | 6.2           | 16              | 26          | M02        | 3.917        | 1.000 | dd   | 3.0, 1.5      | -               | 22<eq> | M10        |
| 1.201        | 3.000 | d     | 6.2           | 26              | 16          | M03        | 3.986        | 1.000 | ddd  | 9.5, 8.2, 6.9 | -               | 50<'>  | M13        |
| 2.799        | 2.000 | br s  | -             | -               | 51          | M04        | 4.375        | 1.000 | d    | 8.0           | 57              | 1<ax>  | M11        |
| 3.292        | 1.000 | t     | 9.4           | -               | 24<ax>      | M05        | 4.626        | 1.000 | d    | 1.2           | -               | 11<eq> | M12        |
| 3.343        | 1.000 | br t  | 9.5           | -               | 14<ax>      | M06        | 4.996        | 1.000 | t    | 9.6           | -               | 4<ax>  | M14        |
| 3.384        | 1.000 | t     | 8.5           | -               | 2<ax>       | M28        | 5.185        | 1.000 | d    | 1.1           | -               | 21<eq> | M15        |
| 3.468        | 1.000 | dd    | 11.4, 5.4     | -               | 6<'>        | M27        | 6.278        | 1.000 | d    | 16.0          | -               | 31     | M17        |
| 3.552        | 1.000 | dq    | 9.3, 6.2      | -               | 25<ax>      | M07        | 6.571        | 1.000 | dd   | 8.0, 1.6      | 1<ax>, 38       | 57     | M18        |
| 3.575        | 1.000 | dd    | 8.7, 2.5      | -               | 23<ax>      | M29        | 6.684        | 1.000 | d    | 7.9           | -               | 56     | M19        |
| 3.601        | 1.000 | dq    | 9.3, 6.2      | -               | 15<ax>      | M30        | 6.693        | 1.000 | d    | 1.6           | -               | 53     | M24        |
| 3.677        | 1.000 | br dd | 9.4, 3.5      | -               | 13<ax>      | M08        | 6.781        | 1.000 | d    | 8.2           | 38              | 37     | M20        |
| 3.691        | 1.000 | ddd   | 9.6, 4.4, 2.2 | -               | 5<ax>       | M26        | 6.960        | 1.000 | dd   | 8.2, 1.8      | 37, 57          | 38     | M21        |
| 3.737        | 2.000 | m     | -             | -               | 6<'>, 50<'> | M25        | 7.059        | 1.000 | d    | 1.8           | -               | 34     | M22        |
| 3.807        | 1.000 | t     | 9.2           | -               | 3<ax>       | M09        | 7.601        | 1.000 | d    | 15.8          | -               | 32     | M23        |
| 3.843        | 1.000 | dd    | 3.2, 1.5      | -               | 12<eq>      | M16        |              |       |      |               |                 |        |            |

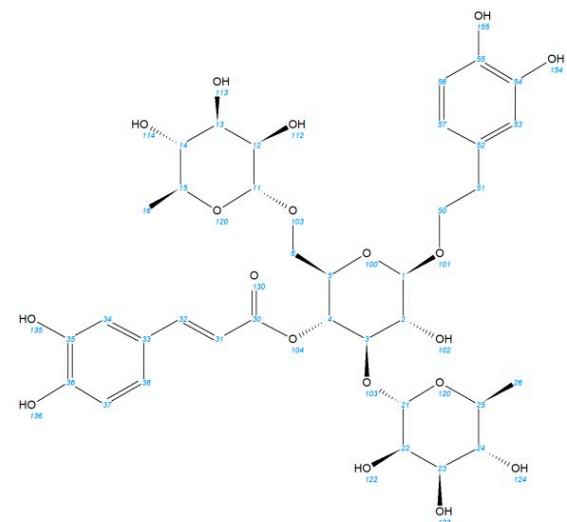

**Figure S24:** <sup>1</sup>H spectrum, structure, numbering and full assignment of PH7 in methanol-d4 at 25 °C

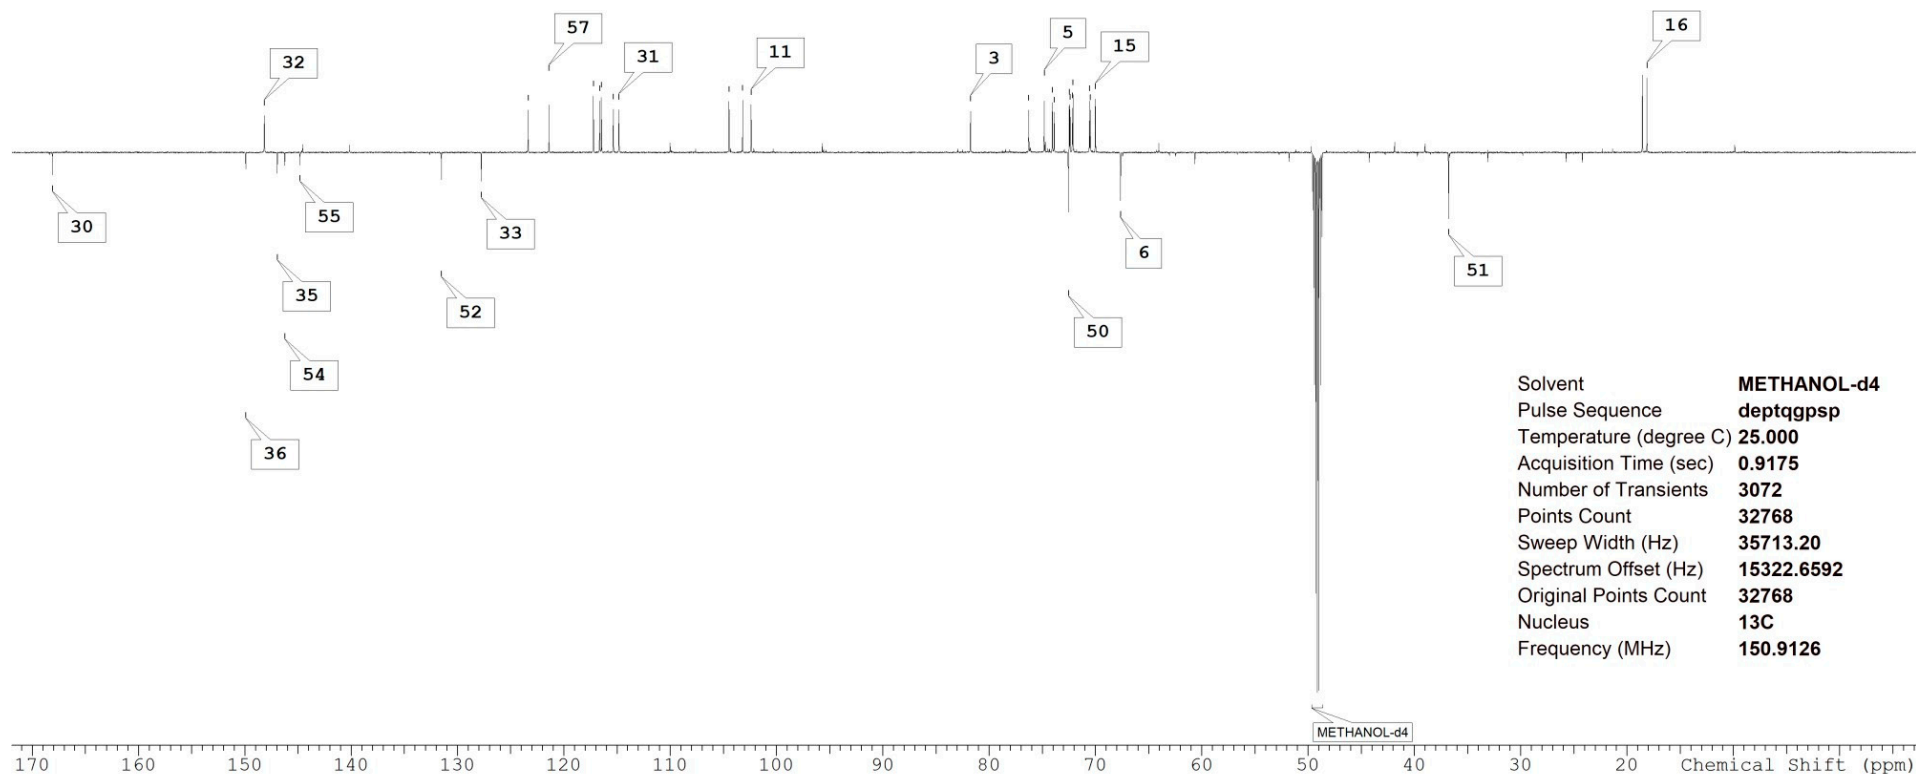

| Shift1 (ppm) | C's   | Type | Atom1 | Multiplet1 | Shift1 (ppm) | C's   | Type | Atom1 | Multiplet1 | Shift1 (ppm) | C's   | Type | Atom1 | Multiplet1 |
|--------------|-------|------|-------|------------|--------------|-------|------|-------|------------|--------------|-------|------|-------|------------|
| 18.150       | 1.000 | s    | 16    | M01        | 76.296       | 1.000 | s    | 2     | M23        | 146.264      | 1.000 | s    | 54    | M38        |
| 18.576       | 1.000 | s    | 26    | M02        | 81.763       | 1.000 | s    | 3     | M24        | 146.971      | 1.000 | s    | 35    | M39        |
| 36.805       | 1.000 | s    | 51    | M07        | 102.404      | 1.000 | s    | 11    | M25        | 148.192      | 1.000 | s    | 32    | M40        |
| 67.665       | 1.000 | s    | 6     | M11        | 103.205      | 1.000 | s    | 21    | M26        | 149.933      | 1.000 | s    | 36    | M41        |
| 70.019       | 1.000 | s    | 15    | M12        | 104.484      | 1.000 | s    | 1     | M27        | 168.125      | 1.000 | s    | 30    | M42        |
| 70.489       | 1.000 | s    | 4     | M13        | 114.840      | 1.000 | s    | 31    | M28        |              |       |      |       |            |
| 70.576       | 1.000 | s    | 25    | M14        | 115.367      | 1.000 | s    | 34    | M29        |              |       |      |       |            |
| 72.128       | 1.000 | s    | 12    | M15        | 116.494      | 1.000 | s    | 56    | M30        |              |       |      |       |            |
| 72.186       | 1.000 | s    | 23    | M16        | 116.646      | 1.000 | s    | 37    | M31        |              |       |      |       |            |
| 72.410       | 1.000 | s    | 13    | M17        | 117.238      | 1.000 | s    | 53    | M32        |              |       |      |       |            |
| 72.475       | 1.000 | s    | 22    | M18        | 121.412      | 1.000 | s    | 57    | M33        |              |       |      |       |            |
| 72.569       | 1.000 | s    | 50    | M19        | 123.377      | 1.000 | s    | 38    | M34        |              |       |      |       |            |
| 73.891       | 1.000 | s    | 24    | M20        | 127.789      | 1.000 | s    | 33    | M35        |              |       |      |       |            |
| 74.071       | 1.000 | s    | 14    | M21        | 131.531      | 1.000 | s    | 52    | M36        |              |       |      |       |            |
| 74.837       | 1.000 | s    | 5     | M22        | 144.841      | 1.000 | s    | 55    | M37        |              |       |      |       |            |

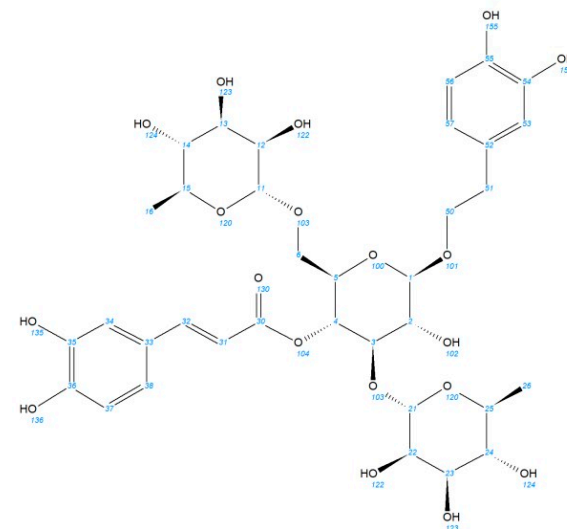

**Figure S25:**  $^{13}\text{C}$  spectrum, structure, numbering and full assignment of **PH7** in methanol- $\text{d}_4$  at 25  $^{\circ}\text{C}$

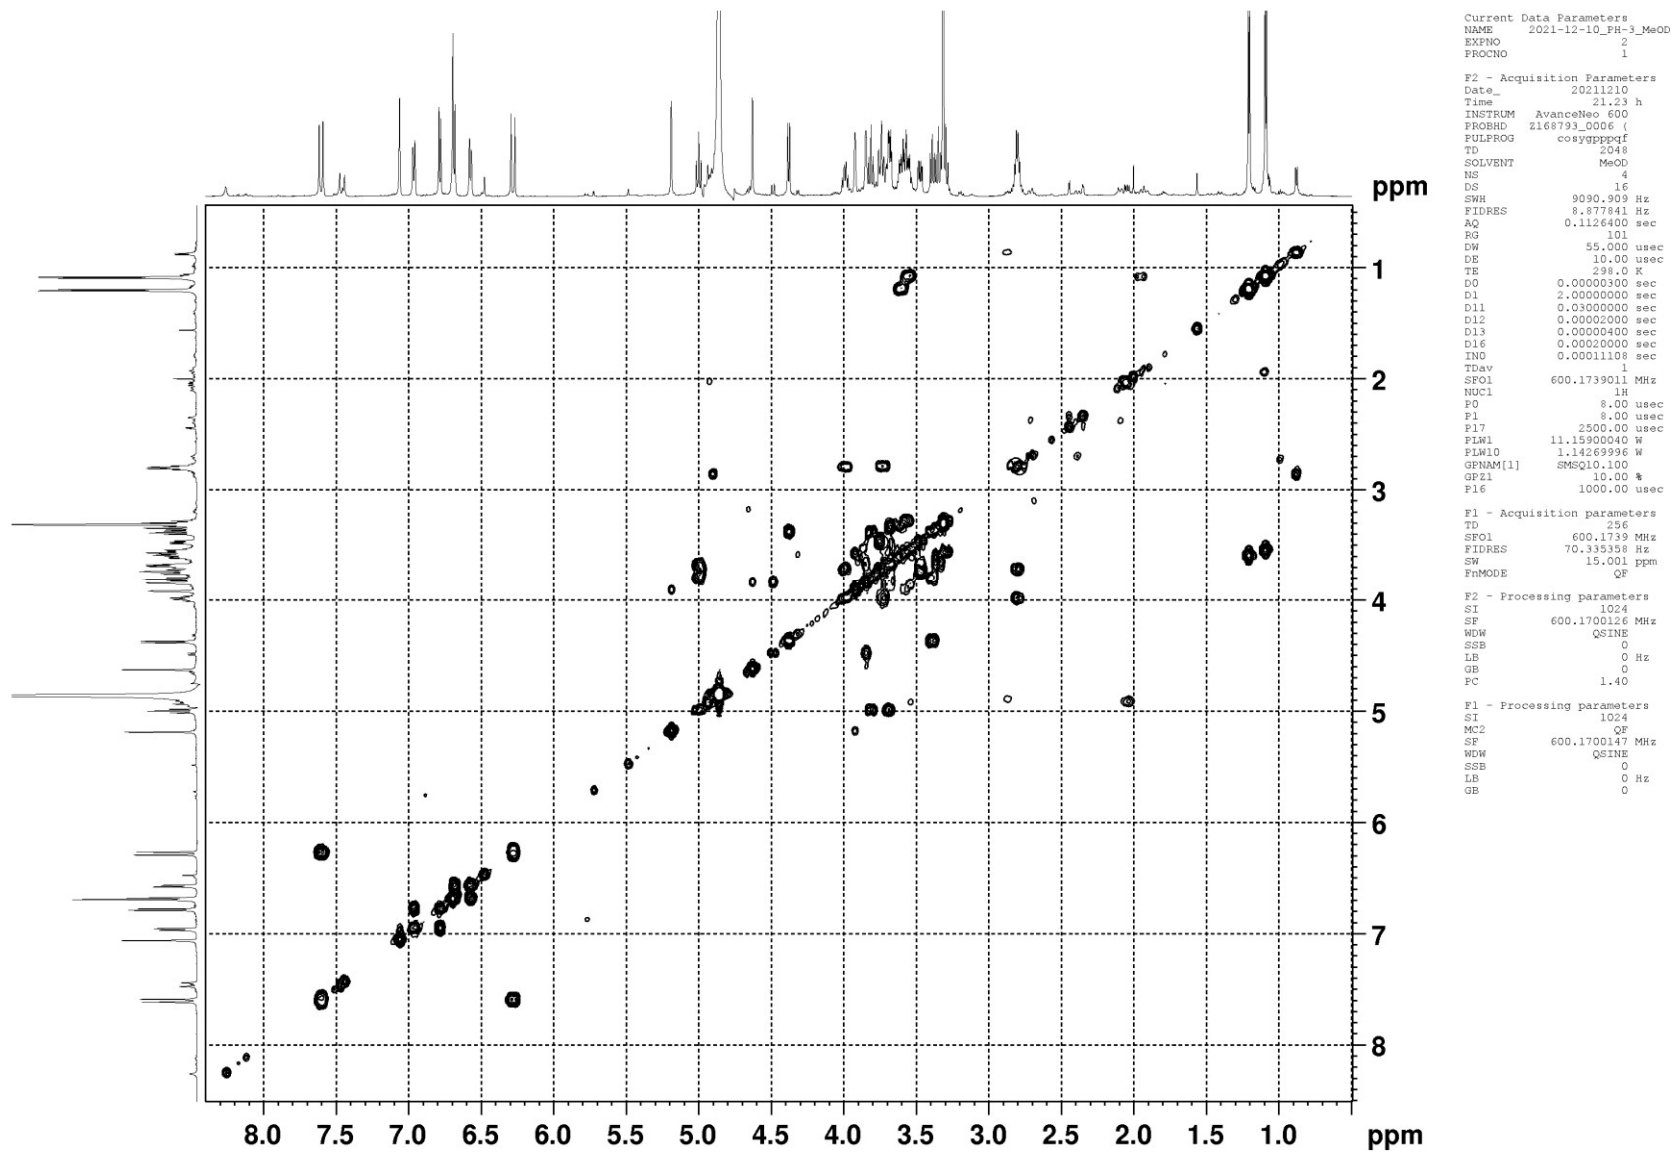

Figure S26: COSY spectrum of PH7 in methanol-d<sub>4</sub> at 25 °C



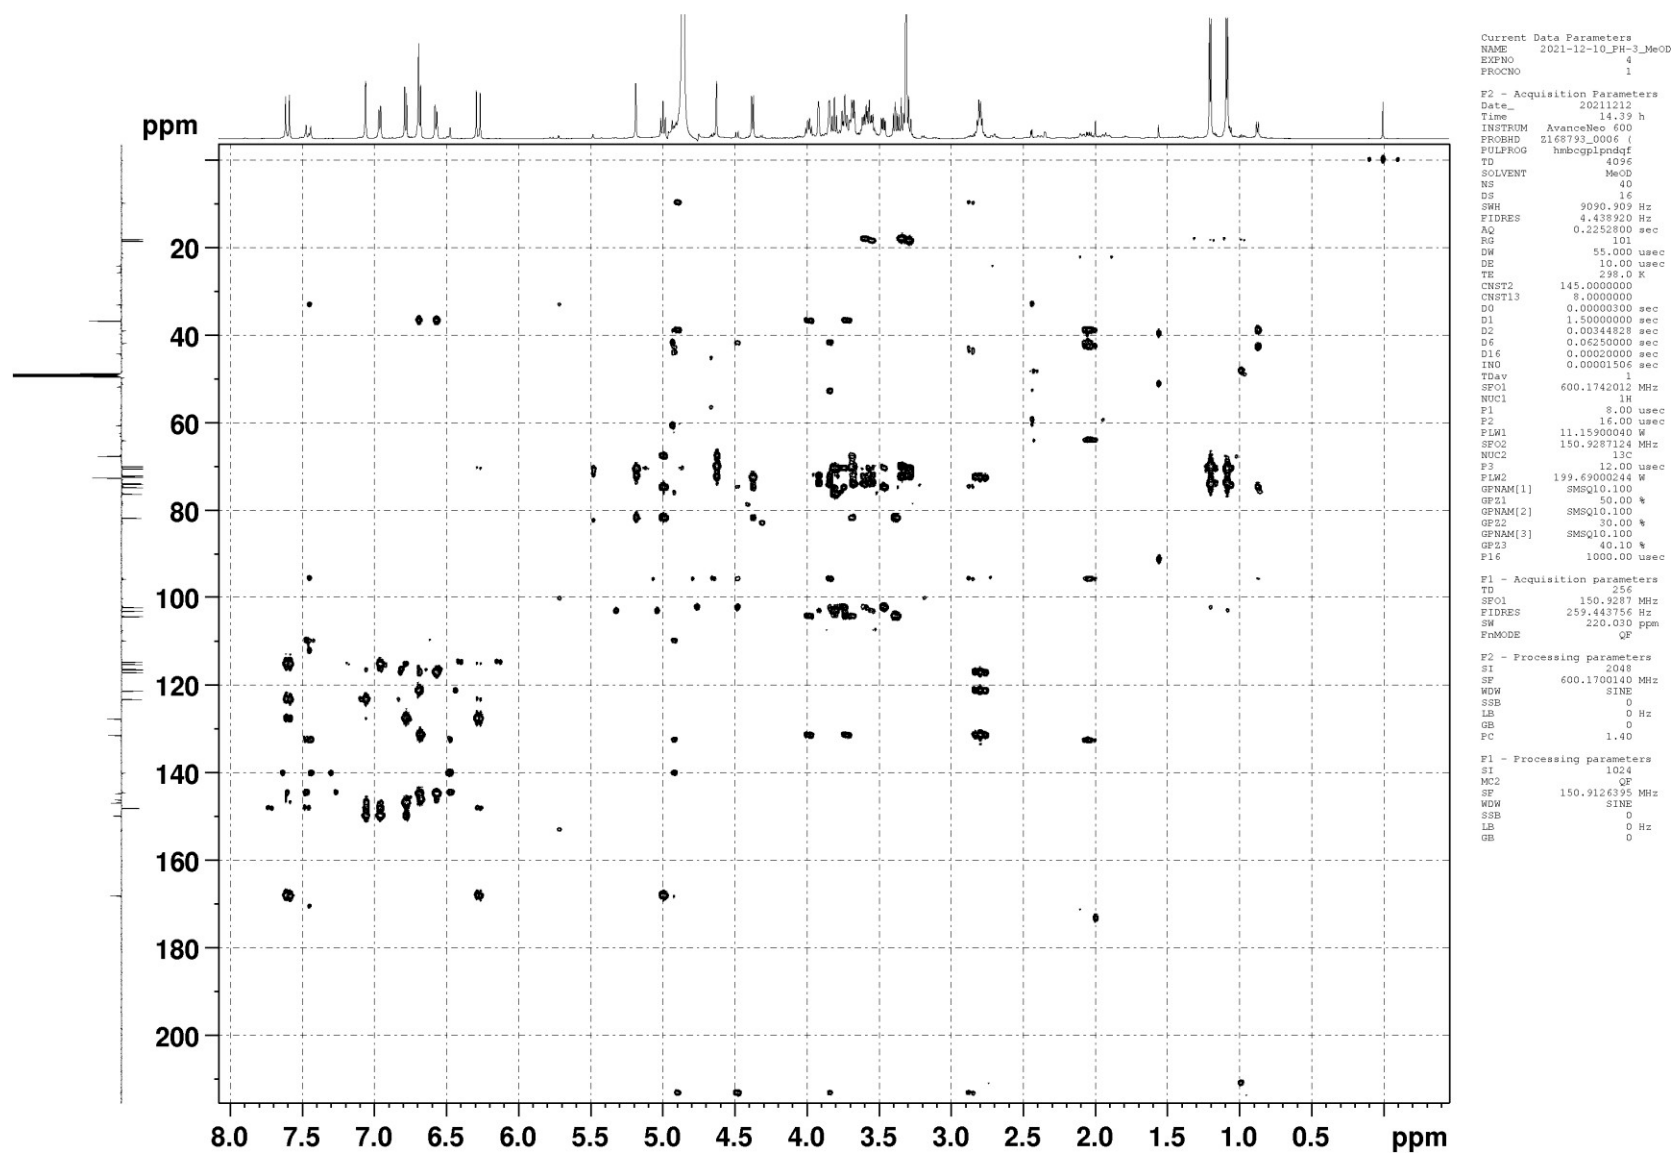

Figure S28:  $^1\text{H}$ - $^{13}\text{C}$  HMBC spectrum of **PH7** in methanol- $\text{d}_4$  at 25 °C



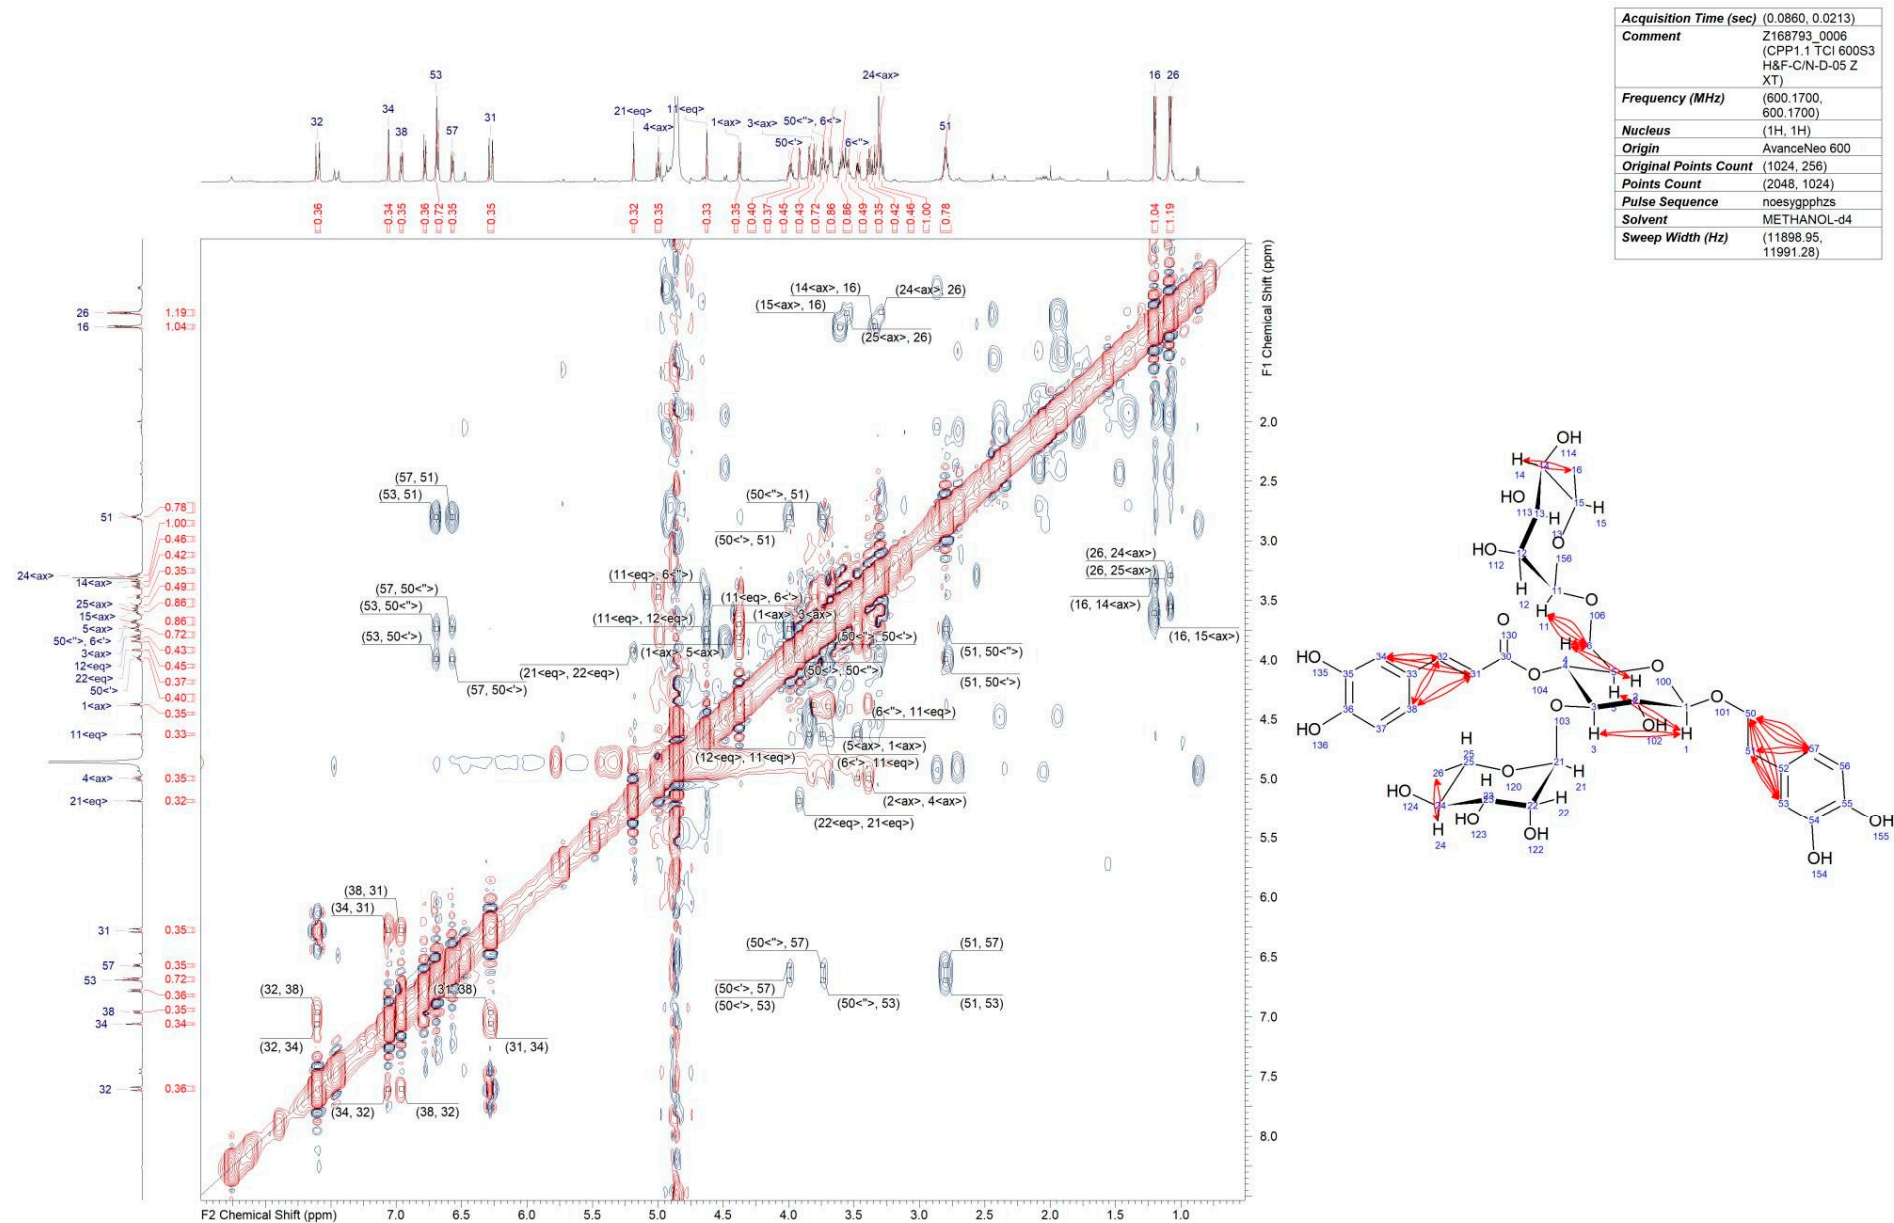

Figure S29: Fully assigned NOESY spectrum of PH7 in methanol-d<sub>4</sub> at 25 °C



**Table S1.** Comparison of proton chemical shifts for all analyzed compounds in methanol- d<sub>4</sub> at 25 °C, the biggest differences marked with superscripted mark “ \* ”.

| Unit                     | Proton | Echinacoside | Verbascoside | PH5   | PH6   | PH7   |
|--------------------------|--------|--------------|--------------|-------|-------|-------|
| <b>β-D-glucopyranose</b> | 1<AX>  | 4.39         | 4.38         | 4.38  | 4.38  | 4.37  |
|                          | 2<AX>  | 3.40         | 3.39         | 3.38  | 3.39  | 3.38  |
|                          | 3<AX>  | 3.81         | 3.82         | 3.77  | 3.78  | 3.81  |
|                          | 4<AX>  | 5.01         | 4.92*        | 4.93* | 4.93* | 5.00  |
|                          | 5<AX>  | 3.77         | 3.54*        | 3.54* | 3.54* | 3.69  |
|                          | 6<'>   | 3.94         | 3.62*        | 3.64* | 3.63* | 3.47* |
|                          | 6<">   | 3.64         | 3.52*        | 3.54* | 3.54* | 3.74* |
| <b>Second sugar</b>      | 11     | 4.30         | n/a          | 4.36  | 4.32  | 4.63* |
|                          | 12     | 3.21         | n/a          | 3.58* | 3.61* | 3.84* |
|                          | 13     | 3.34         | n/a          | 3.47* | 3.51* | 3.68* |
|                          | 14     | 3.28         | n/a          | 3.81* | 3.78* | 3.34  |
|                          | 15     | 3.22         | n/a          | 3.54* | n/a   | 3.60  |
|                          | 16<'>  | 3.83         | n/a          | 3.82  | 3.86* | 1.20  |
|                          | 16<">  | 3.65         | n/a          | 3.72  | 3.54* | n/a   |
| <b>α-L-rhamnose</b>      | 21<EQ> | 5.18         | 5.19         | 5.57* | 5.48* | 5.18  |
|                          | 22<EQ> | 3.92         | 3.92         | 3.99* | 3.96* | 3.92  |
|                          | 23<AX> | 3.57         | 3.57         | 3.66* | 3.66* | 3.58  |
|                          | 24<AX> | 3.29         | 3.29         | 3.28  | 3.29  | 3.29  |
|                          | 25<AX> | 3.55         | 3.57         | 3.54  | 3.54  | 3.55  |
|                          | 26     | 1.09         | 1.09         | 1.05  | 1.06  | 1.08  |
| <b>Caffeic acid</b>      | 31     | 6.28         | 6.28         | 6.28  | 6.28  | 6.28  |
|                          | 32     | 7.60         | 7.60         | 7.60  | 7.59  | 7.60  |
|                          | 34     | 7.06         | 7.06         | 7.06  | 7.07  | 7.06  |
|                          | 37     | 6.78         | 6.78         | 6.78  | 6.79  | 6.78  |
|                          | 38     | 6.96         | 6.96         | 6.96  | 6.96  | 6.96  |
| <b>Hydroxytyrosol</b>    | 50<'>  | 4.04         | 4.05         | 4.05  | 4.05  | 3.99  |
|                          | 50<">  | 3.73         | 3.72         | 3.72  | 3.72  | 3.74  |
|                          | 51     | 2.80         | 2.79         | 2.79  | 2.79  | 2.80  |
|                          | 53     | 6.71         | 6.70         | 6.71  | 6.71  | 6.69  |
|                          | 56     | 6.68         | 6.68         | 6.68  | 6.68  | 6.68  |
|                          | 57     | 6.58         | 6.57         | 6.57  | 6.57  | 6.57  |

**Table S2.** Comparison of carbon chemical shifts for all analyzed compounds in methanol- d<sub>4</sub> at 25 °C, the biggest differences marked with superscripted mark “ \* ”.

| Unit                     | Carbon | Echinacoside | Verbascoside | PH5    | PH6    | PH7    |
|--------------------------|--------|--------------|--------------|--------|--------|--------|
| <b>β-D-glucopyranose</b> | 1      | 104.3        | 104.3        | 104.2  | 104.3  | 104.5  |
|                          | 2      | 76.3         | 76.3         | 76.3   | 76.1   | 76.3   |
|                          | 3      | 81.8         | 81.8         | 83.1   | 82.5   | 81.8   |
|                          | 4      | 70.7         | 70.7         | 70.5   | 70.5   | 70.5   |
|                          | 5      | 74.8         | 76.2         | 76.1   | 76.0   | 74.8   |
|                          | 6      | 69.5         | 62.5*        | 62.4*  | 62.4*  | 67.7*  |
| <b>second sugar</b>      | 11     | 104.8        | n/a          | 107.7* | 107.6* | 102.4* |
|                          | 12     | 75.2         | n/a          | 73.0*  | 72.9*  | 72.1   |
|                          | 13     | 77.9         | n/a          | 75.0*  | 74.4*  | 72.4   |
|                          | 14     | 71.6         | n/a          | 70.5*  | 70.0*  | 74.1   |
|                          | 15     | 78.0         | n/a          | 77.1   |        | 70.0   |
|                          | 16     | 62.7         | n/a          | 63.0   | 67.4*  | 18.2   |
| <b>α-L-rhamnose</b>      | 21     | 103.2        | 103.2        | 102.5  | 102.1  | 103.2  |
|                          | 22     | 72.5         | 72.5         | 83.2*  | 82.9*  | 72.5   |
|                          | 23     | 72.2         | 72.2         | 71.9   | 72.0   | 72.2   |
|                          | 24     | 73.9         | 73.9         | 74.2   | 74.3   | 73.9   |
|                          | 25     | 70.6         | 70.6         | 70.5   | 70.6   | 70.6   |
|                          | 26     | 18.6         | 18.6         | 18.6   | 18.5   | 18.6   |
| <b>caffeic acid</b>      | 30     | 168.6        | 168.4        | 168.4  | 168.4  | 168.1  |
|                          | 31     | 114.8        | 114.8        | 114.8  | 114.8  | 114.8  |
|                          | 32     | 148.4        | 148.2        | 148.1  | 148.1  | 148.2  |
|                          | 33     | 127.8        | 127.8        | 127.8  | 127.8  | 127.8  |
|                          | 34     | 115.4        | 115.4        | 115.3  | 115.4  | 115.4  |
|                          | 35     | 147.0        | 146.3        | 147.0  | 146.9  | 147.0  |
|                          | 36     | 150.0        | 149.9        | 149.9  | 149.9  | 149.9  |
|                          | 37     | 116.7        | 116.6        | 116.7  | 116.7  | 116.6  |
|                          | 38     | 123.4        | 123.4        | 123.4  | 123.4  | 123.4  |
| <b>hydroxytyrosol</b>    | 50     | 72.5         | 72.4         | 72.3   | 72.3   | 72.6   |
|                          | 51     | 36.7         | 36.7         | 36.6   | 36.7   | 36.8   |
|                          | 52     | 131.6        | 131.6        | 131.7  | 131.6  | 131.5  |
|                          | 53     | 117.3        | 117.2        | 117.3  | 117.3  | 117.2  |
|                          | 54     | 146.2        | 147.0        | 146.2  | 146.2  | 146.3  |
|                          | 55     | 144.8        | 144.8        | 144.8  | 144.7  | 144.8  |
|                          | 56     | 116.5        | 116.4        | 116.4  | 116.4  | 116.5  |
|                          | 57     | 121.5        | 121.4        | 121.4  | 121.4  | 121.4  |

**Table S3.** Comparison of coupling constants  $^nJ_{H,H}$  (Hz) for all analyzed compounds in methanol- $d_4$  at 25 °C, the biggest differences marked with superscripted mark “ \* ”.

| $^nJ_{H,H}$ /Hz                           | Proton   | Echinacoside | Verbascoside | PH5                  | PH6                  | PH7       |
|-------------------------------------------|----------|--------------|--------------|----------------------|----------------------|-----------|
| <b><math>\beta</math>-D-glucopyranose</b> | 1, 2     | 7.8          | 7.8          | 8.0                  | 7.8                  | 8.0       |
|                                           | 2, 3     | 9.3          | 9.2          | 9.1                  | 9.3                  | 9.2       |
|                                           | 3, 4     | 9.6          | 9.5          | 9.3                  | 9.3                  | 9.6       |
|                                           | 4, 5     | 9.6          | 9.5          | 9.3                  | 9.3                  | 9.6       |
|                                           | 5, 6a    | 2.2          | <1*          | overlap              | 3.5                  | 2.2       |
|                                           | 5, 6b    | 5.5          | 5.8          | overlap              | overlap              | 5.5       |
|                                           | 6a, 6b   | 11.4         | 10.2         | 12.4                 | 13.6                 | 11.4      |
| <b>second sugar</b>                       | 11, 12   | 7.6          | n/a          | 7.6                  | 7.3                  | 1.5       |
|                                           | 12, 13   | 9.3          | n/a          | 9.6                  | 9.0                  | 3.2       |
|                                           | 13, 14   | 9.1          | n/a          | 3.4*                 | 3.3*                 | 9.5       |
|                                           | 14, 15   | 9.0          | n/a          | overlap (ca 2-3 Hz)* | n/a                  | 9.3       |
|                                           | 15, 16a  | 2.3          | n/a          | 7.3*                 | n/a                  | 6.2       |
|                                           | 15, 16b  | 5.6          | n/a          | overlap              | n/a                  | n/a       |
|                                           | 16a, 16b | 11.9         | n/a          | 11.4                 | 12.8*                | n/a       |
|                                           | 14, 16a  | n/a          | n/a          | n/a                  | 2.1*                 | n/a       |
| <b><math>\alpha</math>-L-rhamnose</b>     | 14, 16b  | n/a          | n/a          | n/a                  | overlap (ca 3-4 Hz)* | n/a       |
|                                           | 21, 22   | 1.6          | 1.6          | 1.3                  | 1.5                  | 1.5       |
|                                           | 22, 23   | 3.3          | 3.2          | 3.1                  | 3.3                  | 3.0       |
|                                           | 23, 24   | 9.5          | 9.6          | 9.6                  | 9.6                  | 9.5       |
|                                           | 24, 25   | 9.6          | 9.6          | 9.6                  | 9.6                  | 9.3       |
|                                           | 25, 26   | 6.2          | 6.2          | 6.0                  | 6.2                  | 6.2       |
| <b>caffeic acid</b>                       | 31, 32   | 15.8         | 15.8         | 15.8                 |                      | 15.8      |
|                                           | 34, 38   | 2.0          | 2.0          | 1.8                  | 1.9                  | 1.8       |
|                                           | 37, 38   | 8.3          | 8.2          | 8.2                  | 8.2                  | 8.2       |
| <b>hydroxytyrosol</b>                     | 50a, 50b | 9.6          | 9.6          | 9.5                  | 9.5                  | 9.5       |
|                                           | 50a, 51a | 7.0; 8.1     | 6.7; 8.3     | 6.7; 7.8             | 8.4                  | 8.17; 6.9 |
|                                           | 50a, 51b |              |              |                      | 8.4                  |           |
|                                           | 50b, 51a | 6.7; 8.2     | 6.8; 8.3     | overlap              | 9.5                  | overlap   |
|                                           | 50b, 51b |              |              | overlap              | 9.5                  | overlap   |
|                                           | 53, 57   | 2.2          | 2.0          | 1.8                  | 1.8                  | 1.6       |
|                                           | 56, 57   | 8.0          | 8.0          | 8.0                  | 8.0                  | 8.0       |
